# Supplementary material for: Discovery of Novel EGFR Inhibitor Targeting Wild-Type and Mutant Forms of EGFR: In Silico and In Vitro Study
Source: MDPI journal article supplement (doi:10.3390/molecules28073014), 2023-03-28

Discovery of novel EGFR inhibitor targeting wild-type and mutant forms of EGFR: *in silico* and *in vitro* study

Duangjai Todsaporn, Alexander Zubenko, Victor Kartsev, Thitinan Aiebchun, Panupong Mahalapbutr, Anthi Petrou, Athina Geronikaki, Liudmila Divaeva, Victoria Chekrisheva, Ilkay Yildiz, Kiattawee Choowongkamon, Thanyada Rungrotmongkol

**Table of Contents**

General Information

<sup>1</sup>H NMR Spectra of compounds **PD1-PD14**

<sup>13</sup>C NMR Spectra of compounds **PD1-PD14**

**General Information**

NMR <sup>1</sup>H of new compounds were recorded on a spectrometer Bruker AC 300 (300 MHz) in DMSO-*d*<sub>6</sub>. Chemical shifts of nuclei <sup>1</sup>H and <sup>13</sup>C were measured relatively the residual signals of deuterated solvent ( $\delta$  =2.50 ppm for protons and 39.5 ppm for carbon nuclei). Coupling constants (*J*) are reported in Hz.

**<sup>1</sup>H NMR Spectra of compounds PD1-PD14.**

**[4-(Hydroxymethyl)-7-methylfuro[2,3-c]pyridin-2-yl](4-methoxyphenyl)methanone (PD1).**

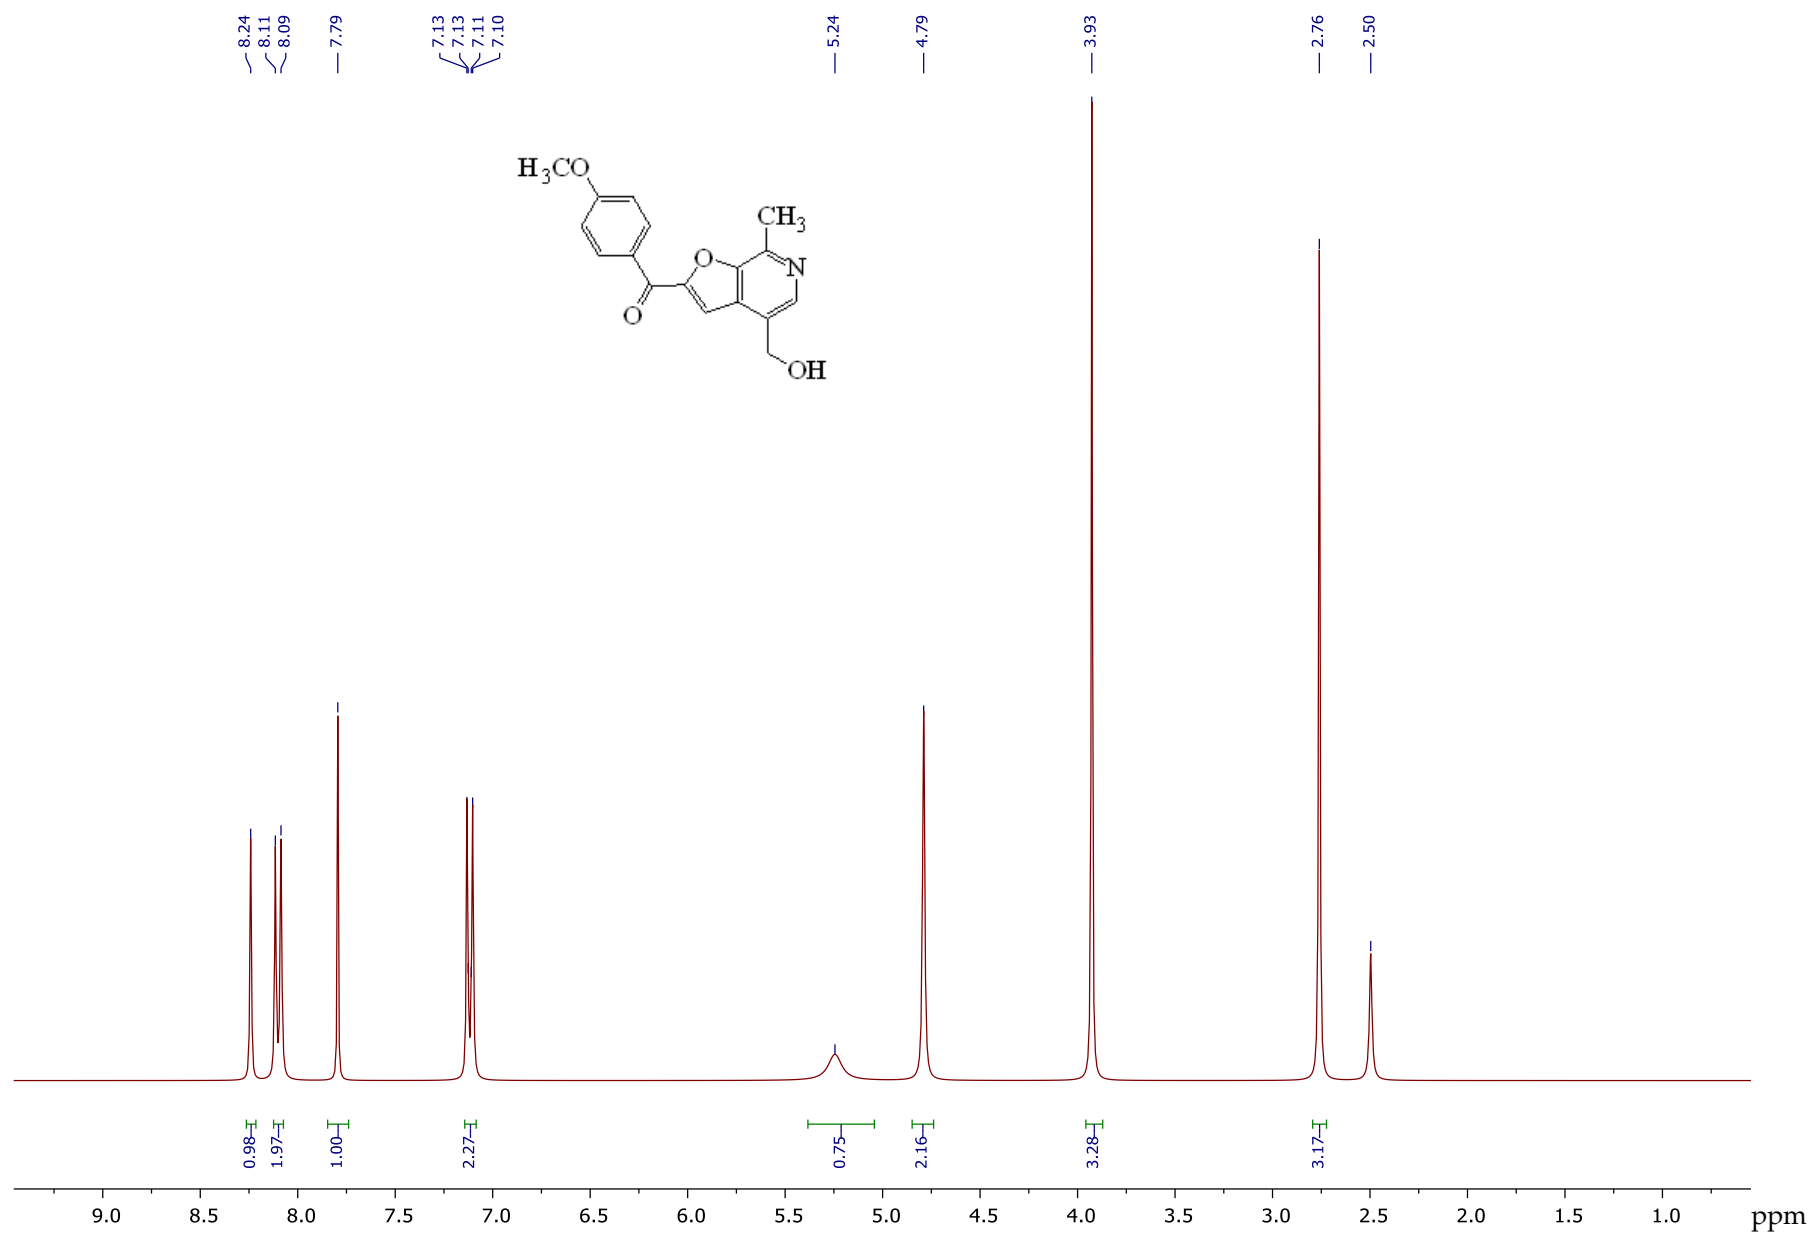

(1,4-Dihydrobenzo[d][1,2]dioxin-6-yl)(4-(hydroxymethyl)-7-methylfuro[2,3-c]pyridin-2-yl)methanone (PD2)

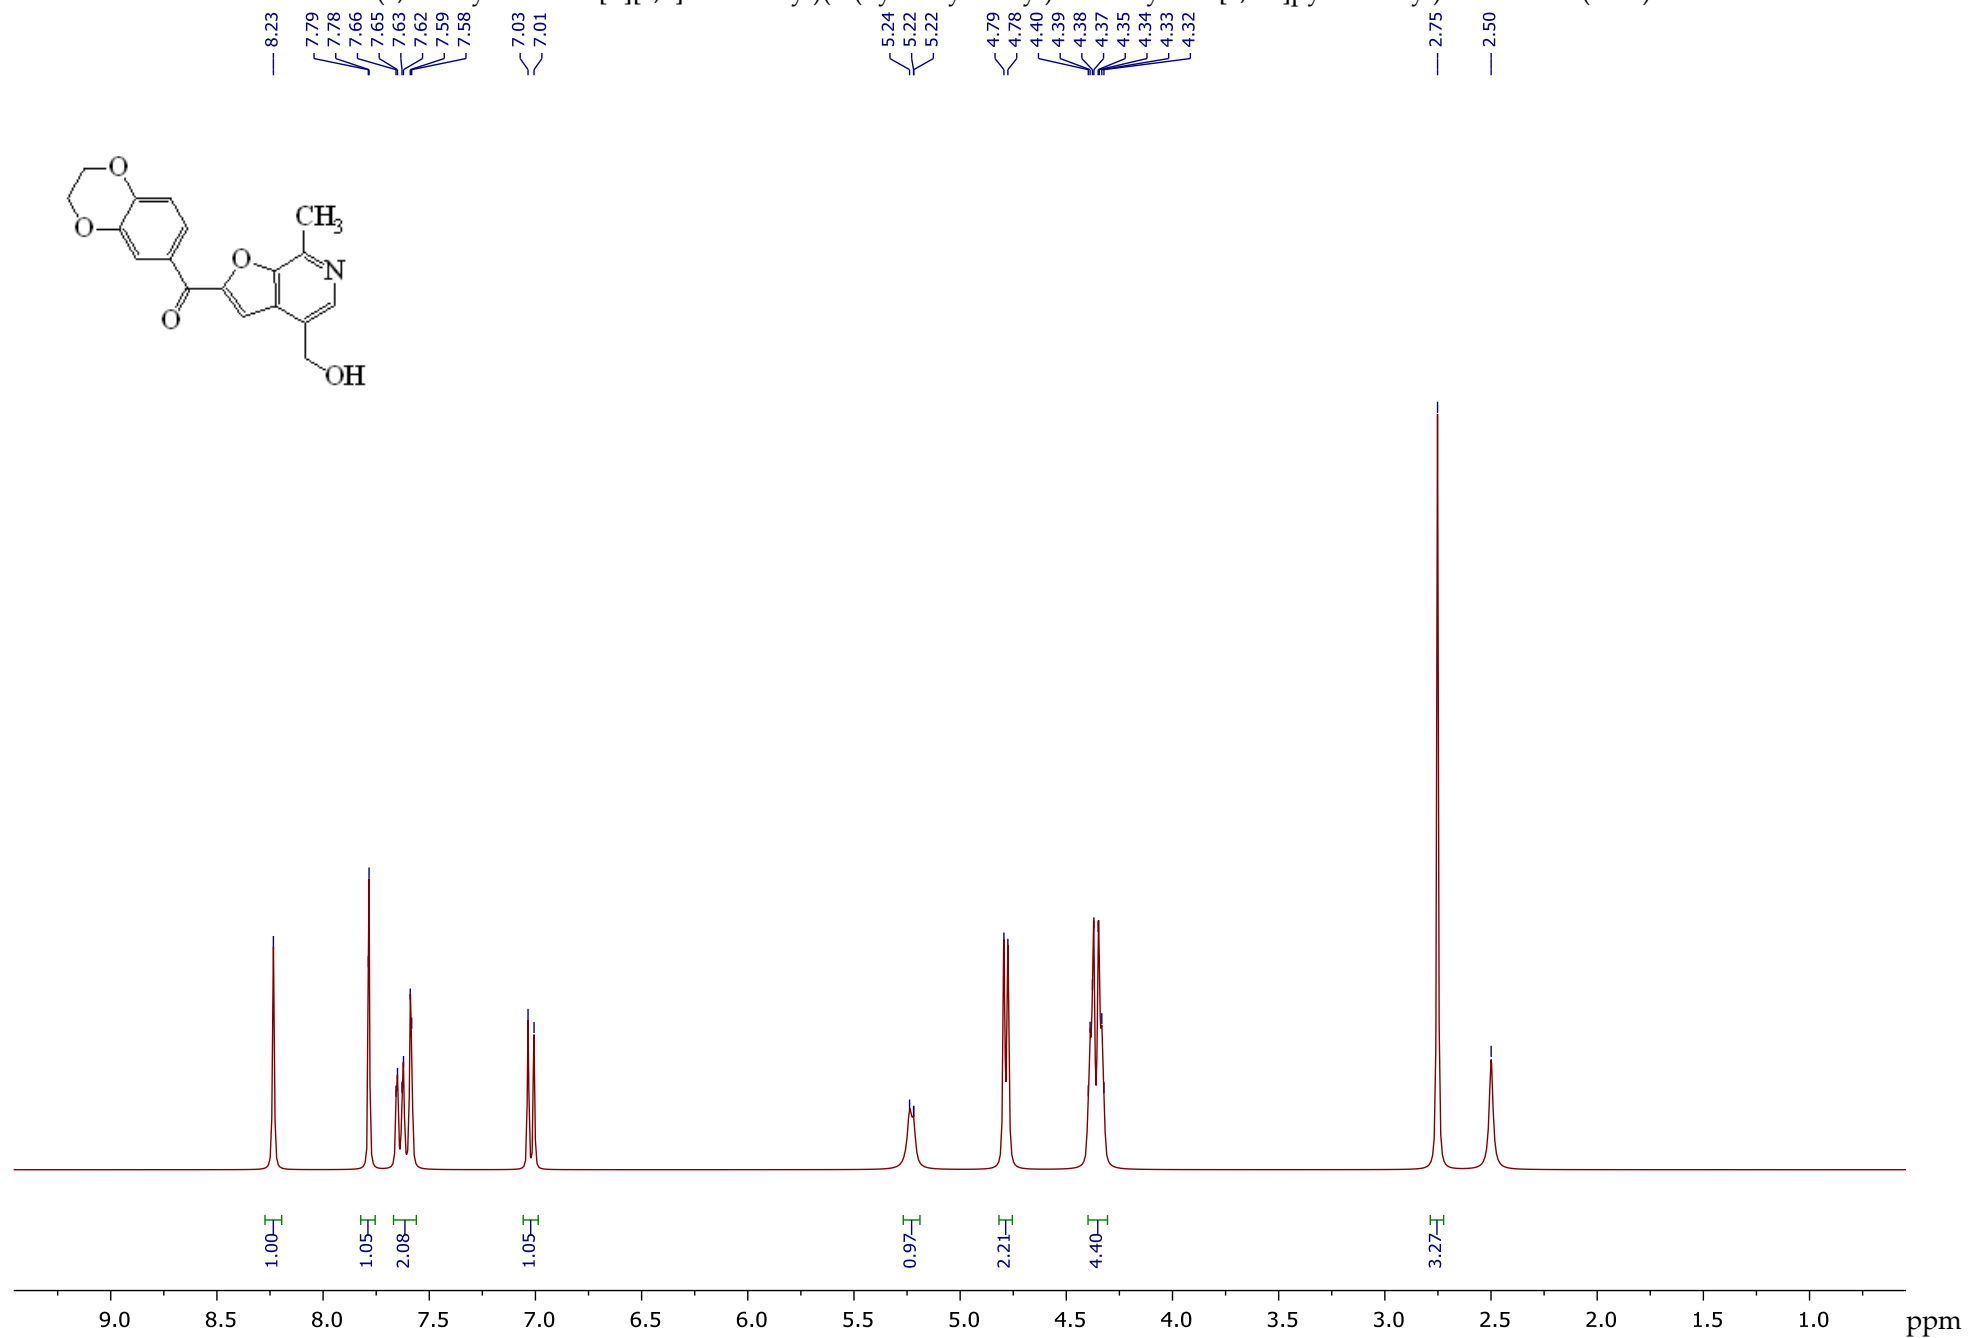

(4-Bromophenyl){7-methyl-4-[(4-(pyridin-2-ylmethyl)piperazin-1-yl)methyl]furo[2,3-c]pyridin-2-yl)methanone dihydrochloride (**PD3**).

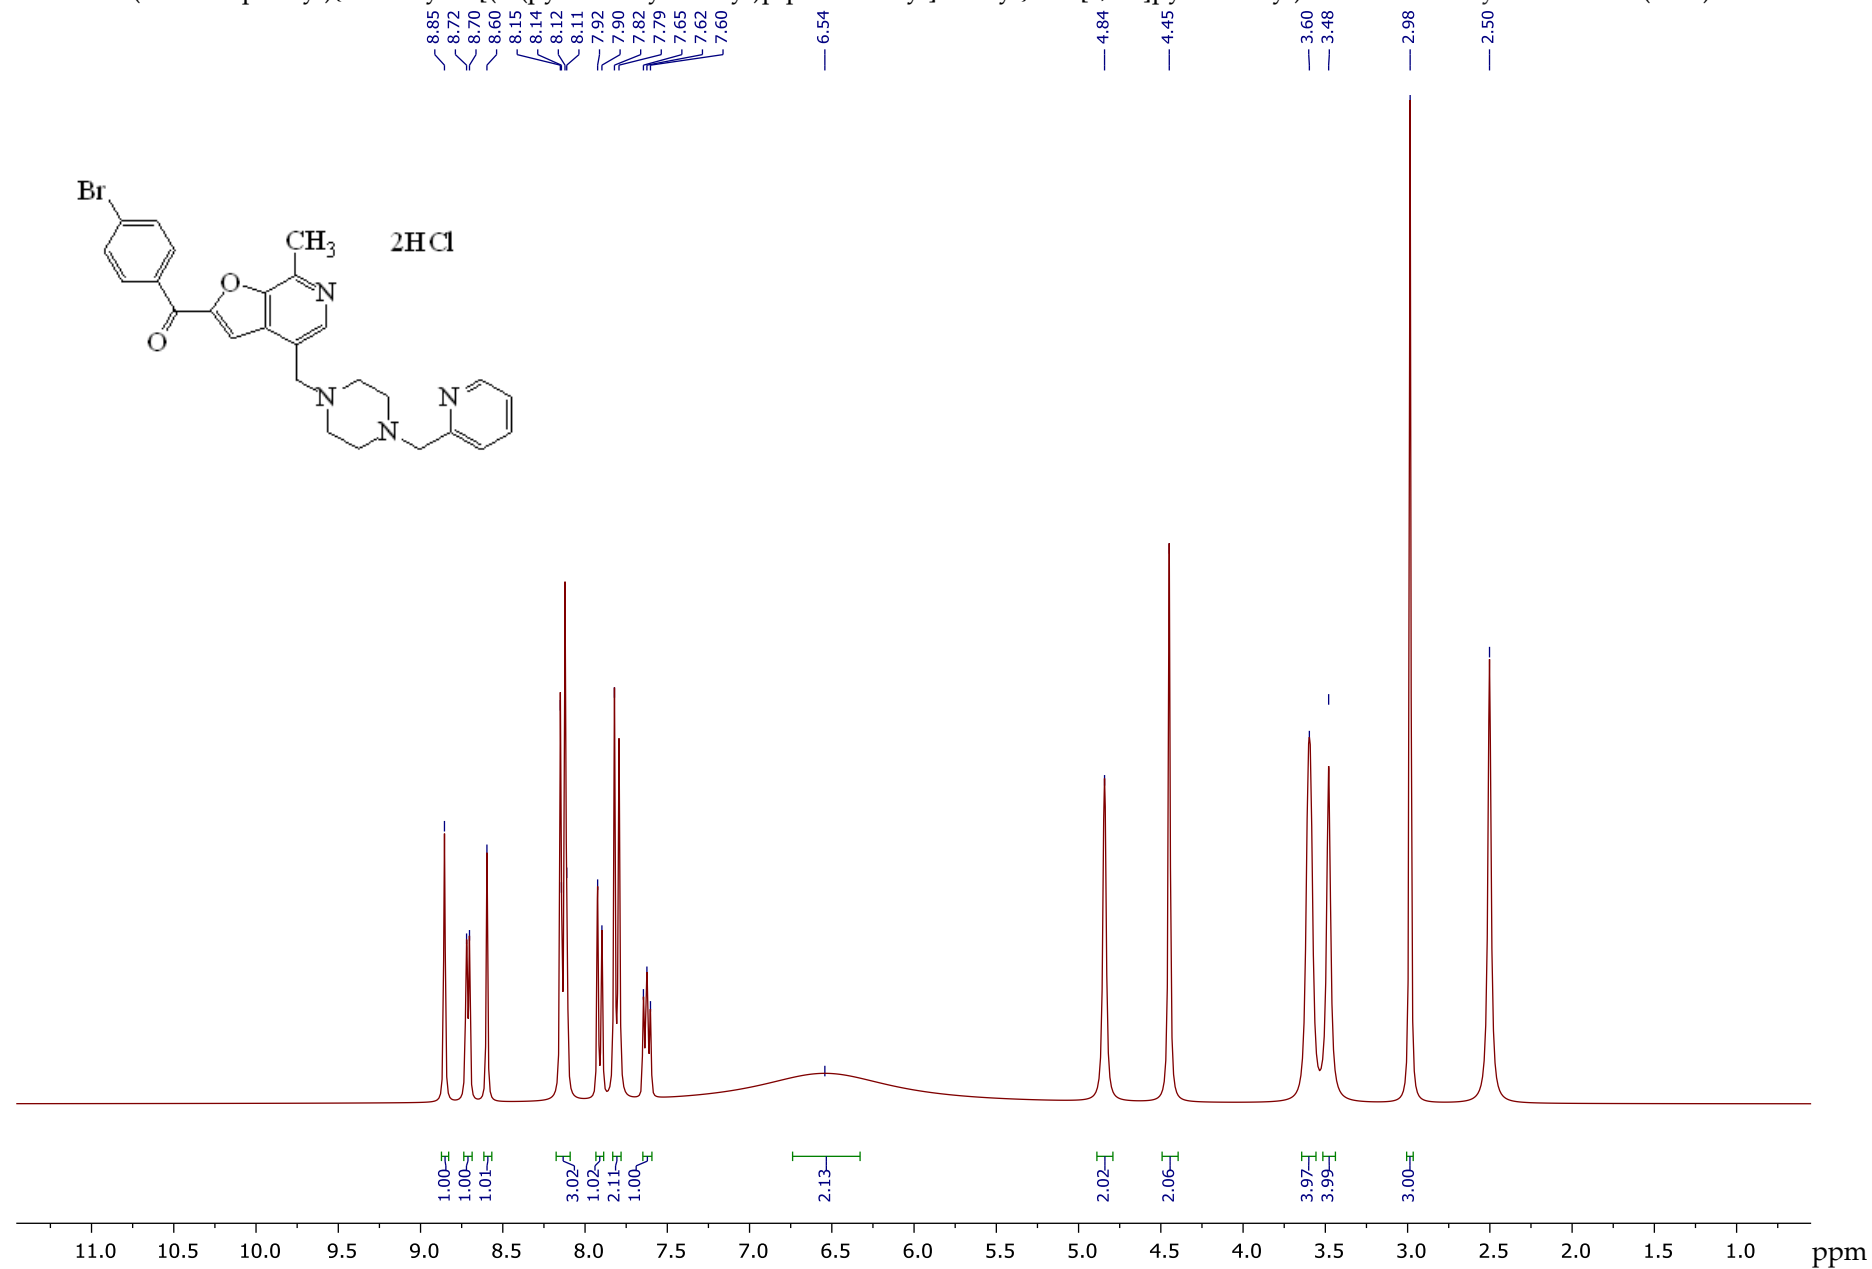

(4-Bromophenyl)(7-methyl-4-((4-(pyridin-3-ylmethyl)piperazin-1-yl)methyl)furo[2,3-c]pyridin-2-yl)methanone (PD4).

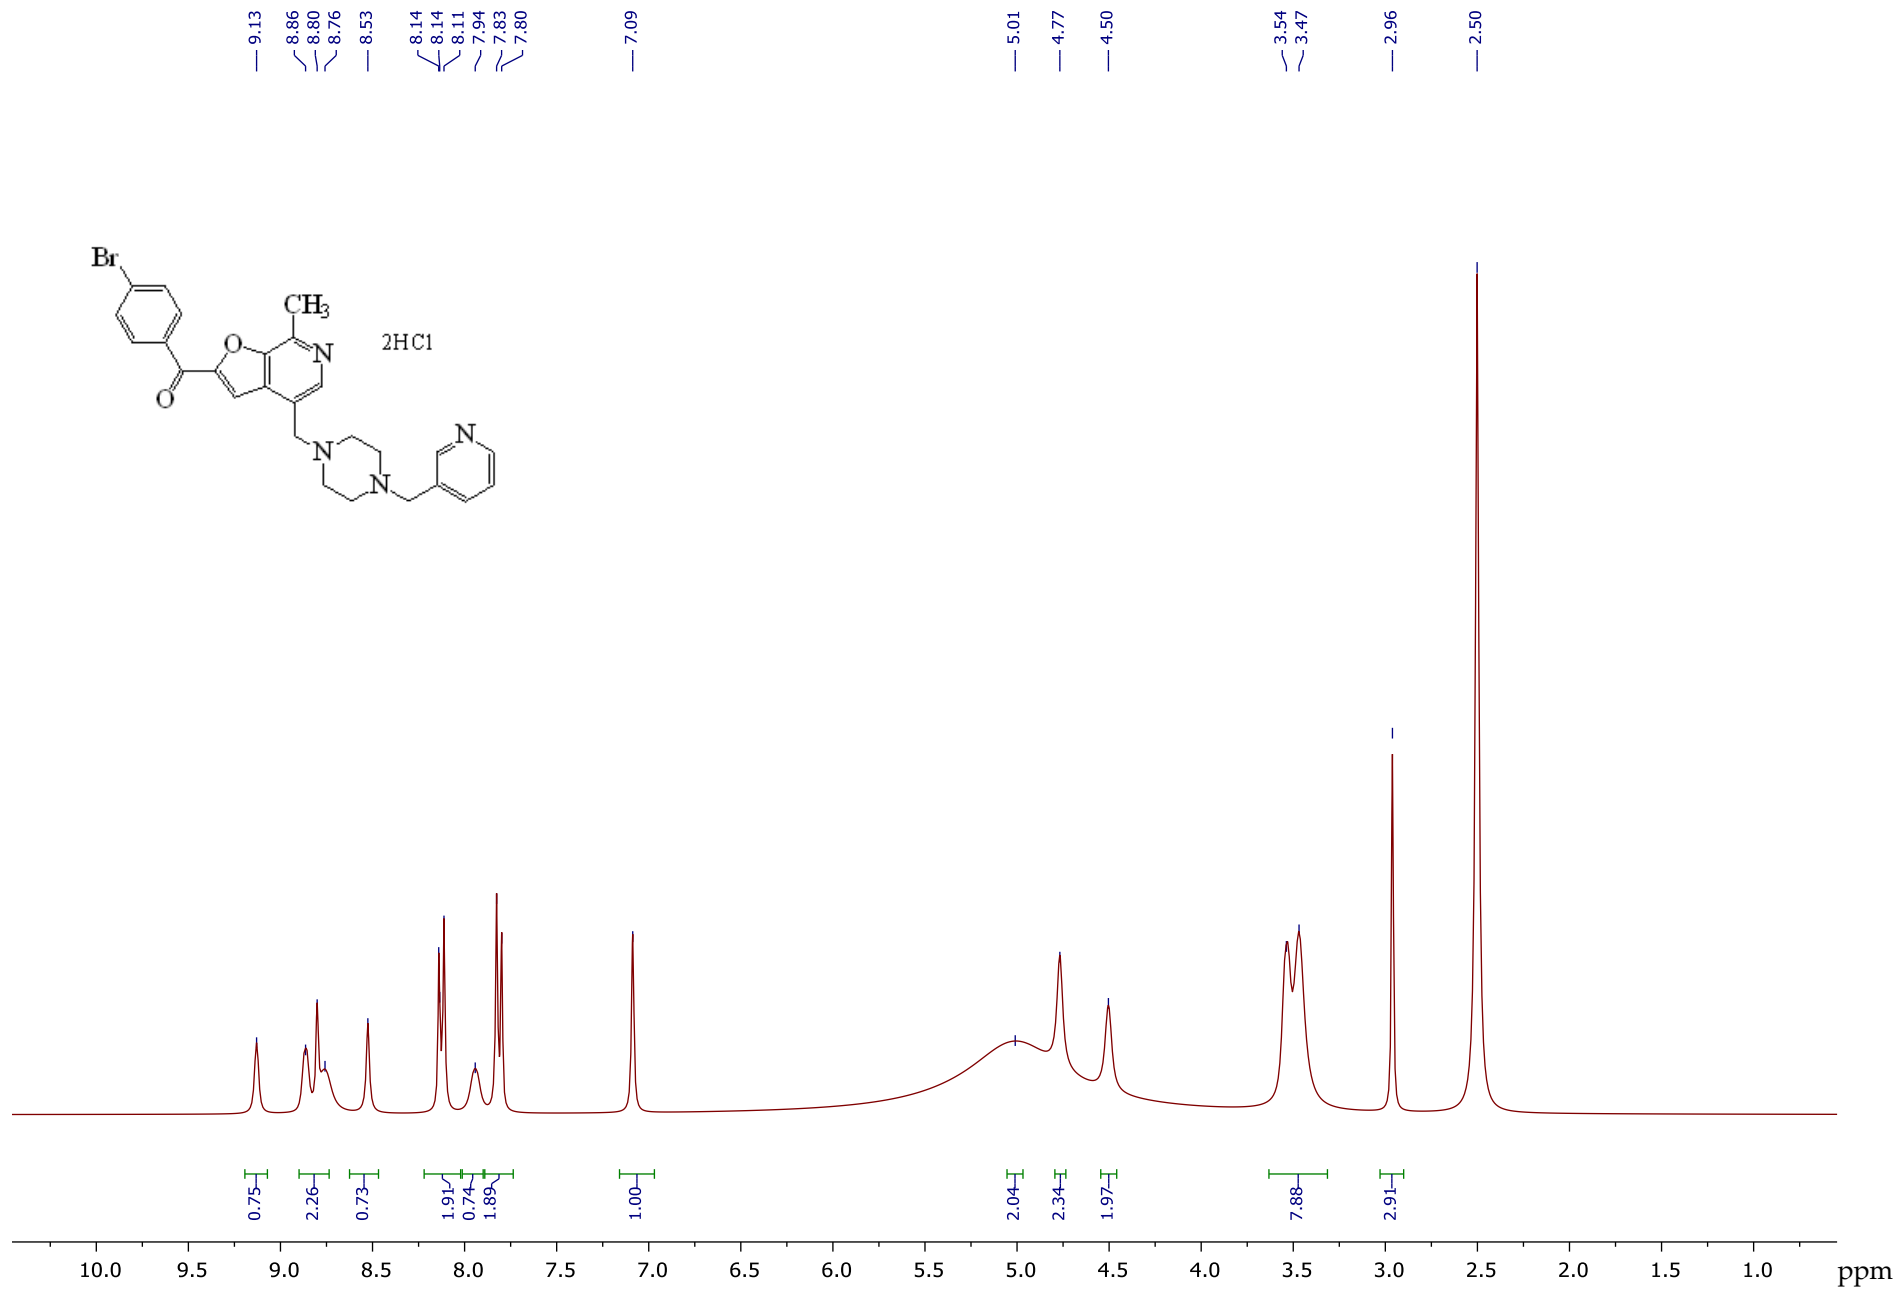

(4-((1H-Imidazol-1-yl)methyl)-7-methylfuro[2,3-c]pyridin-2-yl)(4-bromophenyl)methanone hydrochloride (**PD5**).

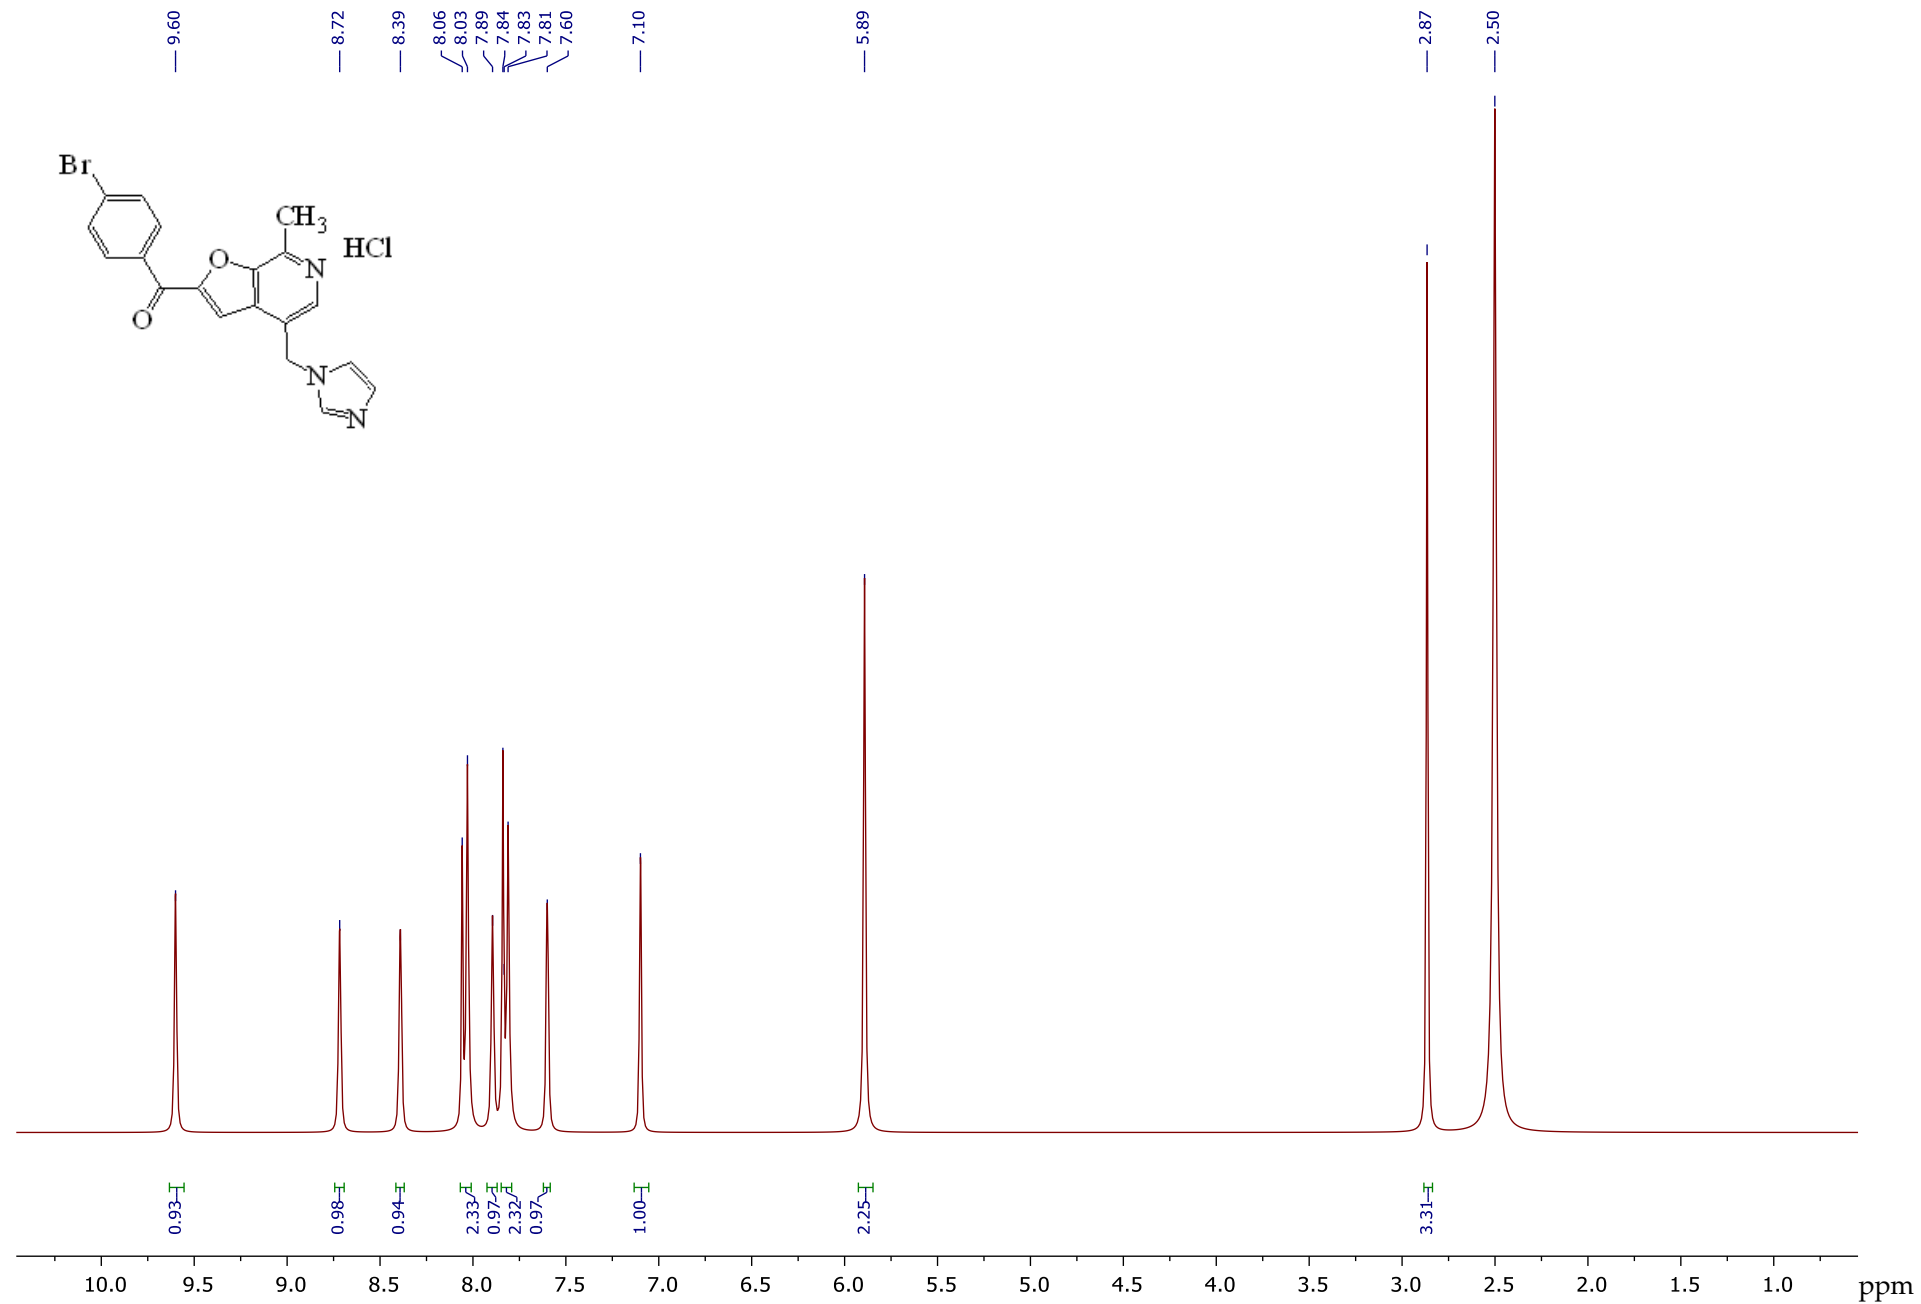

(4-Bromophenyl)(4-((4-(2-hydroxyethyl)piperazin-1-yl)methyl)-7-methylfuro[2,3-c]pyridin-2-yl)methanone (PD6).

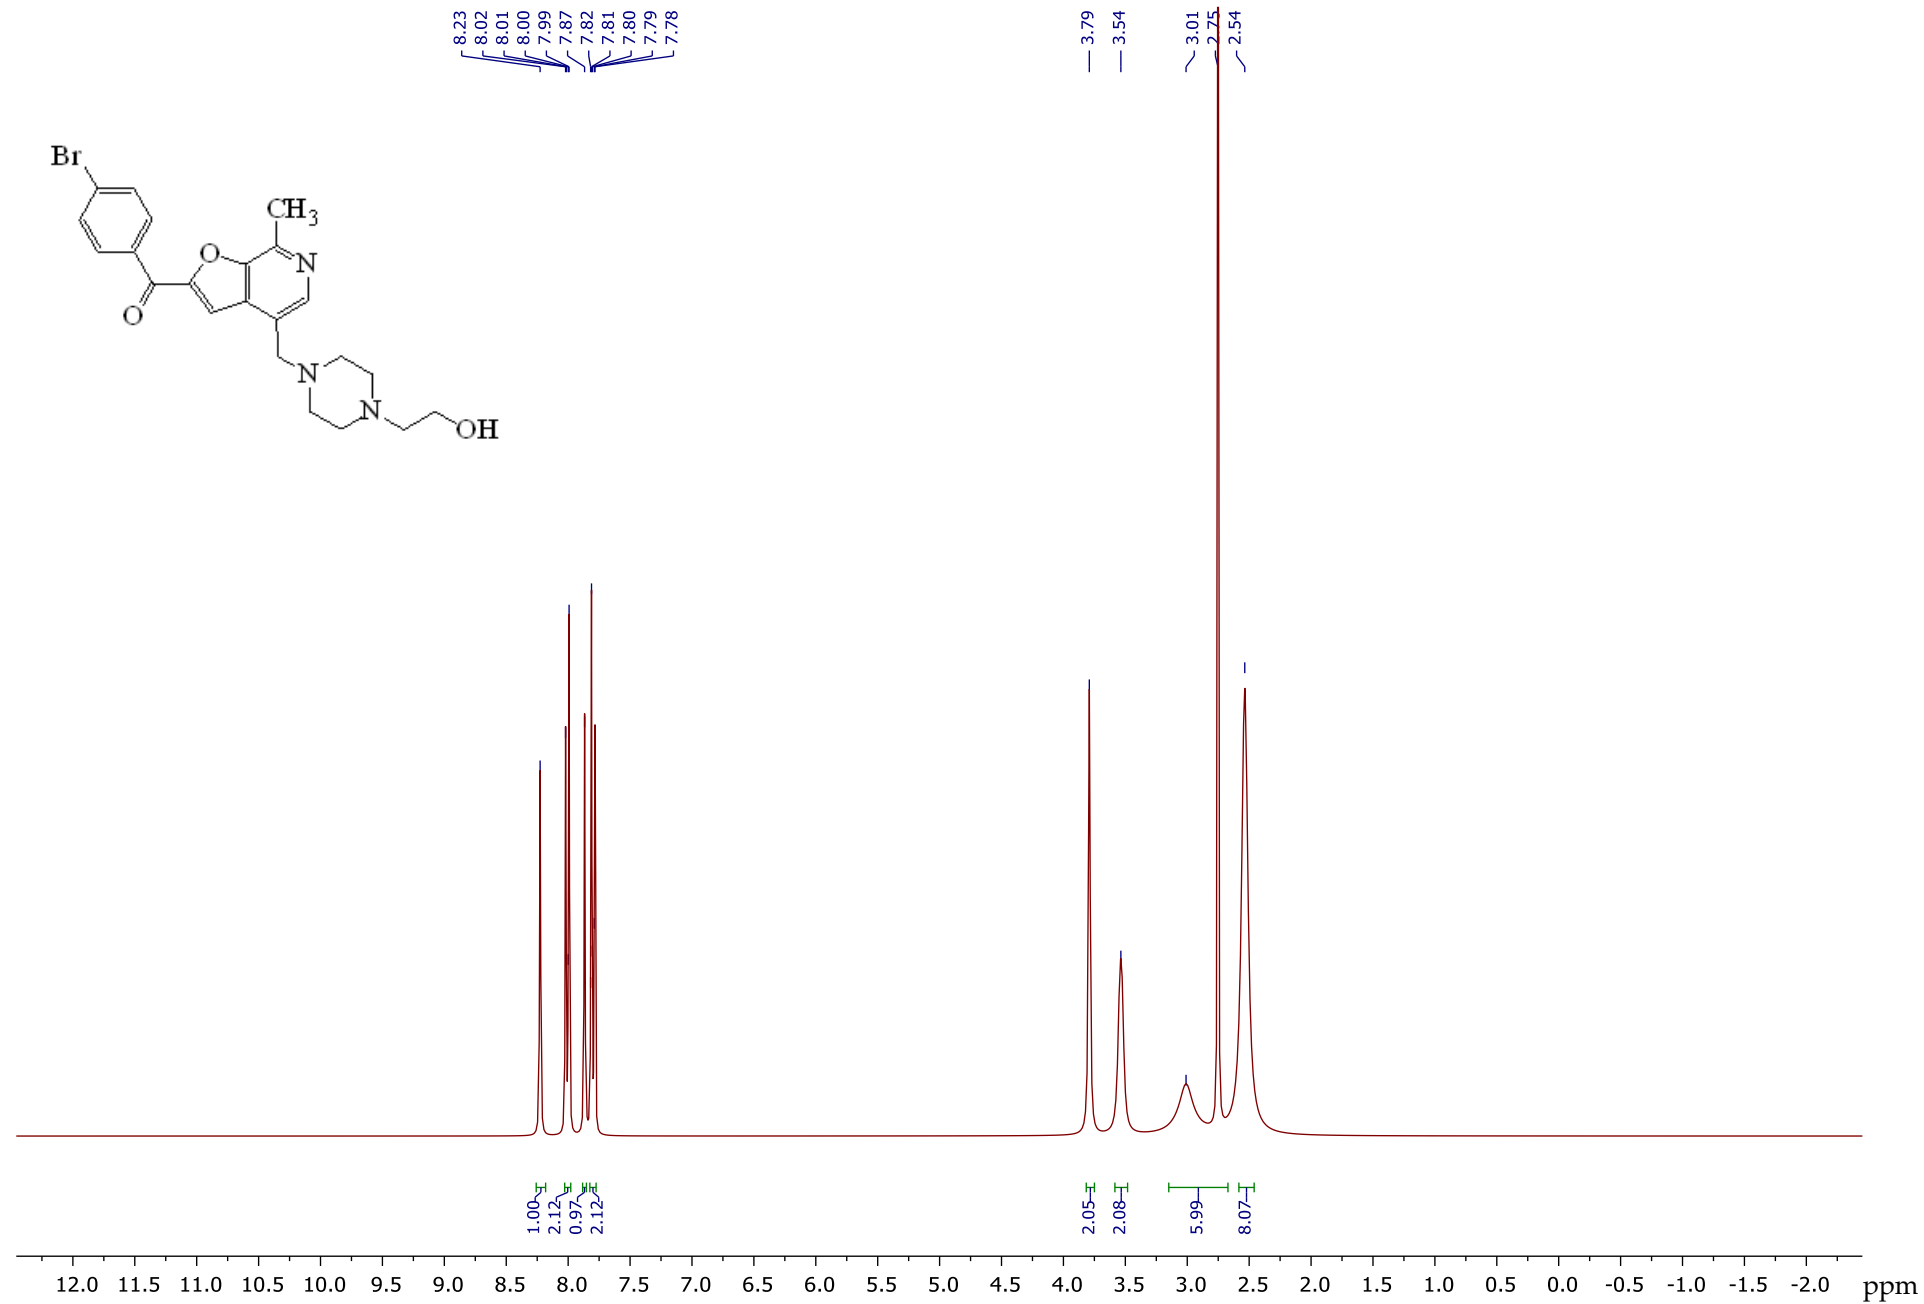

(4-Bromophenyl)(4-((4,5-dichloro-1H-imidazol-1-yl)methyl)-7-methylfuro[2,3-c]pyridin-2-yl)methanone (**PD7**).

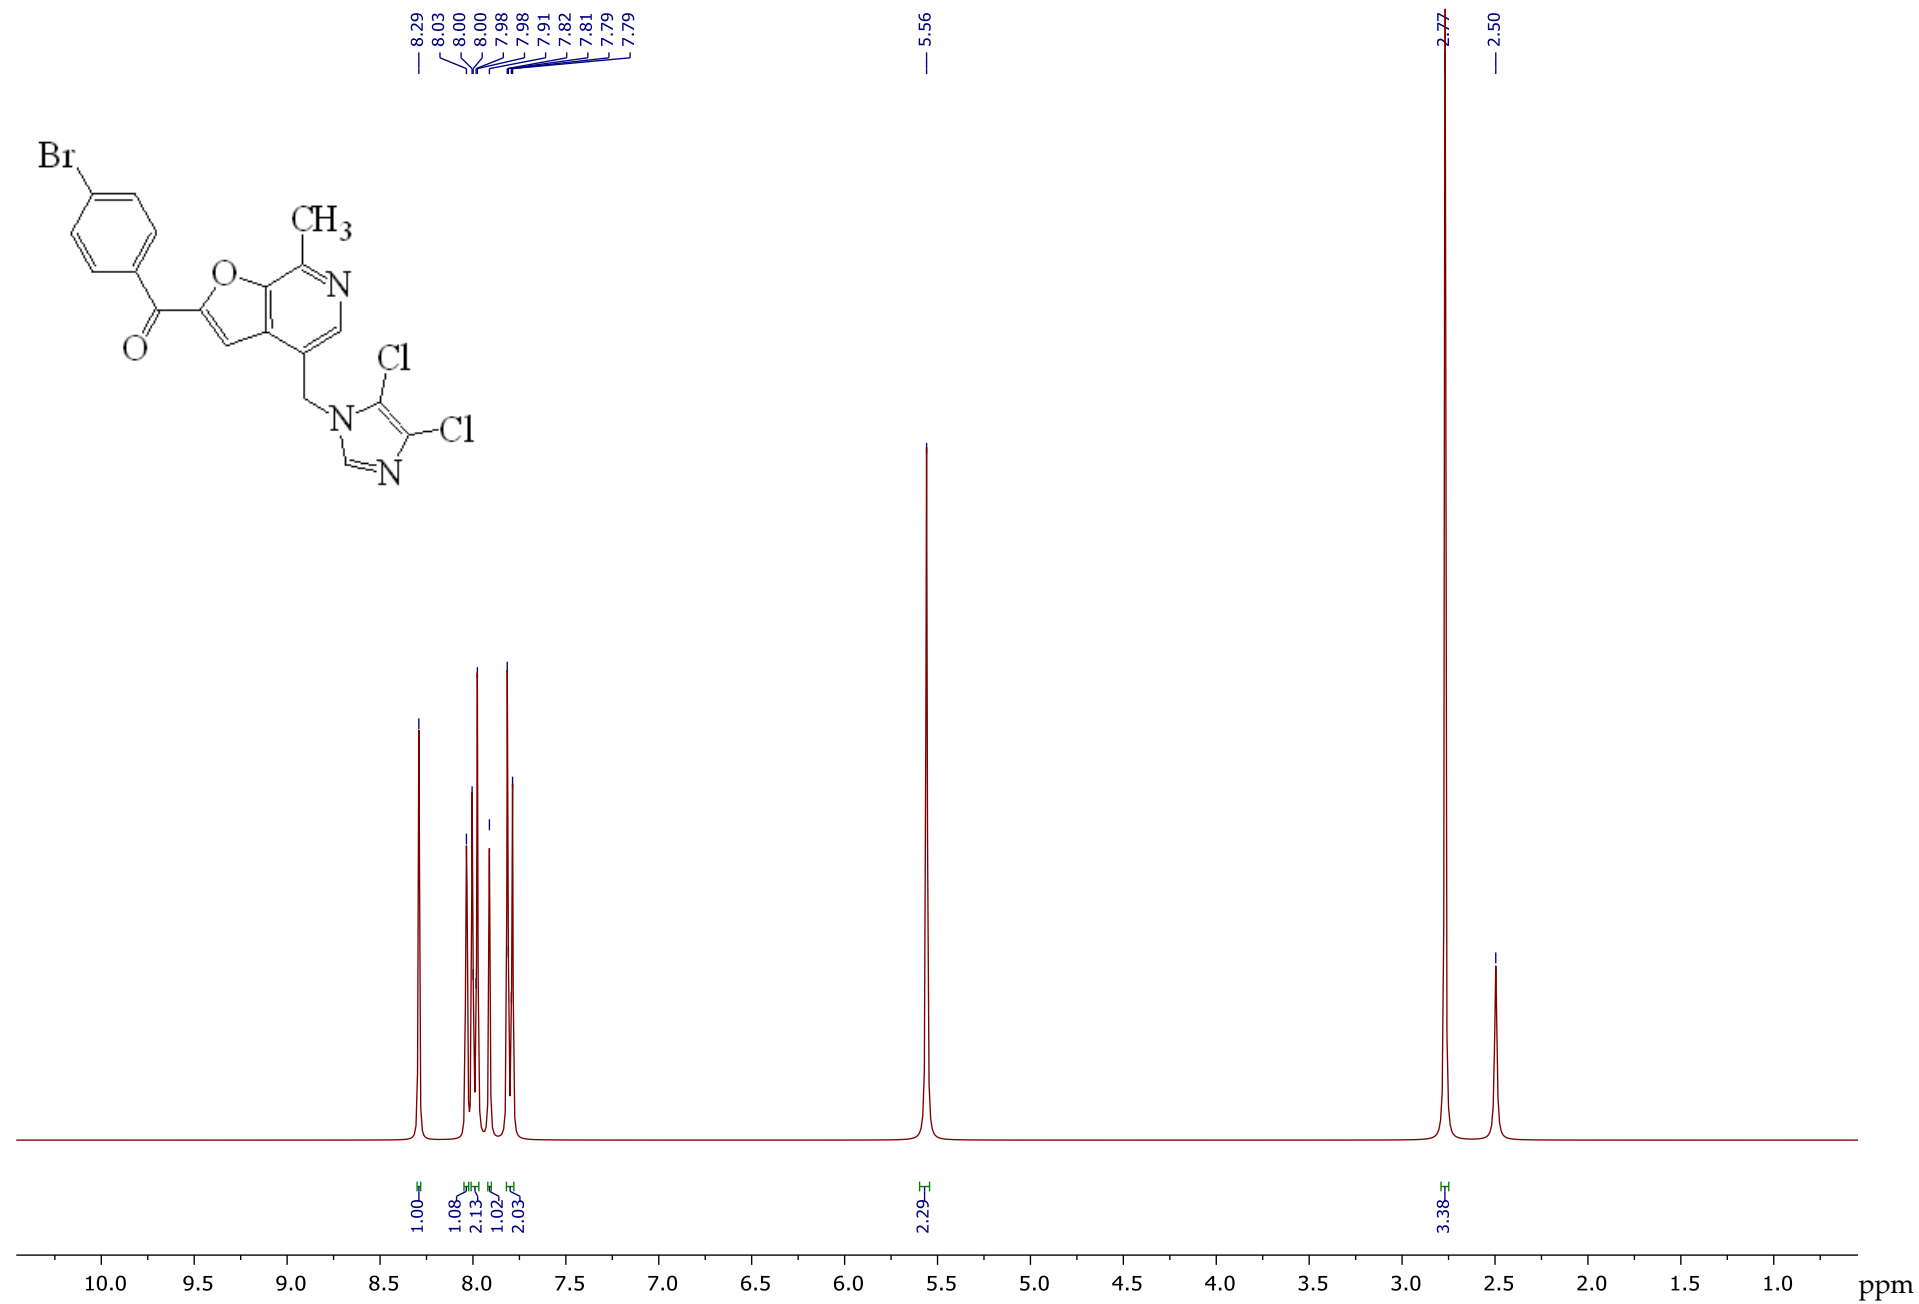



(4-Bromophenyl)(4-((3,4-dihydroisoquinolin-2(1H)-yl)methyl)-7-methylfuro[2,3-c]pyridin-2-yl)methanone (PD8).

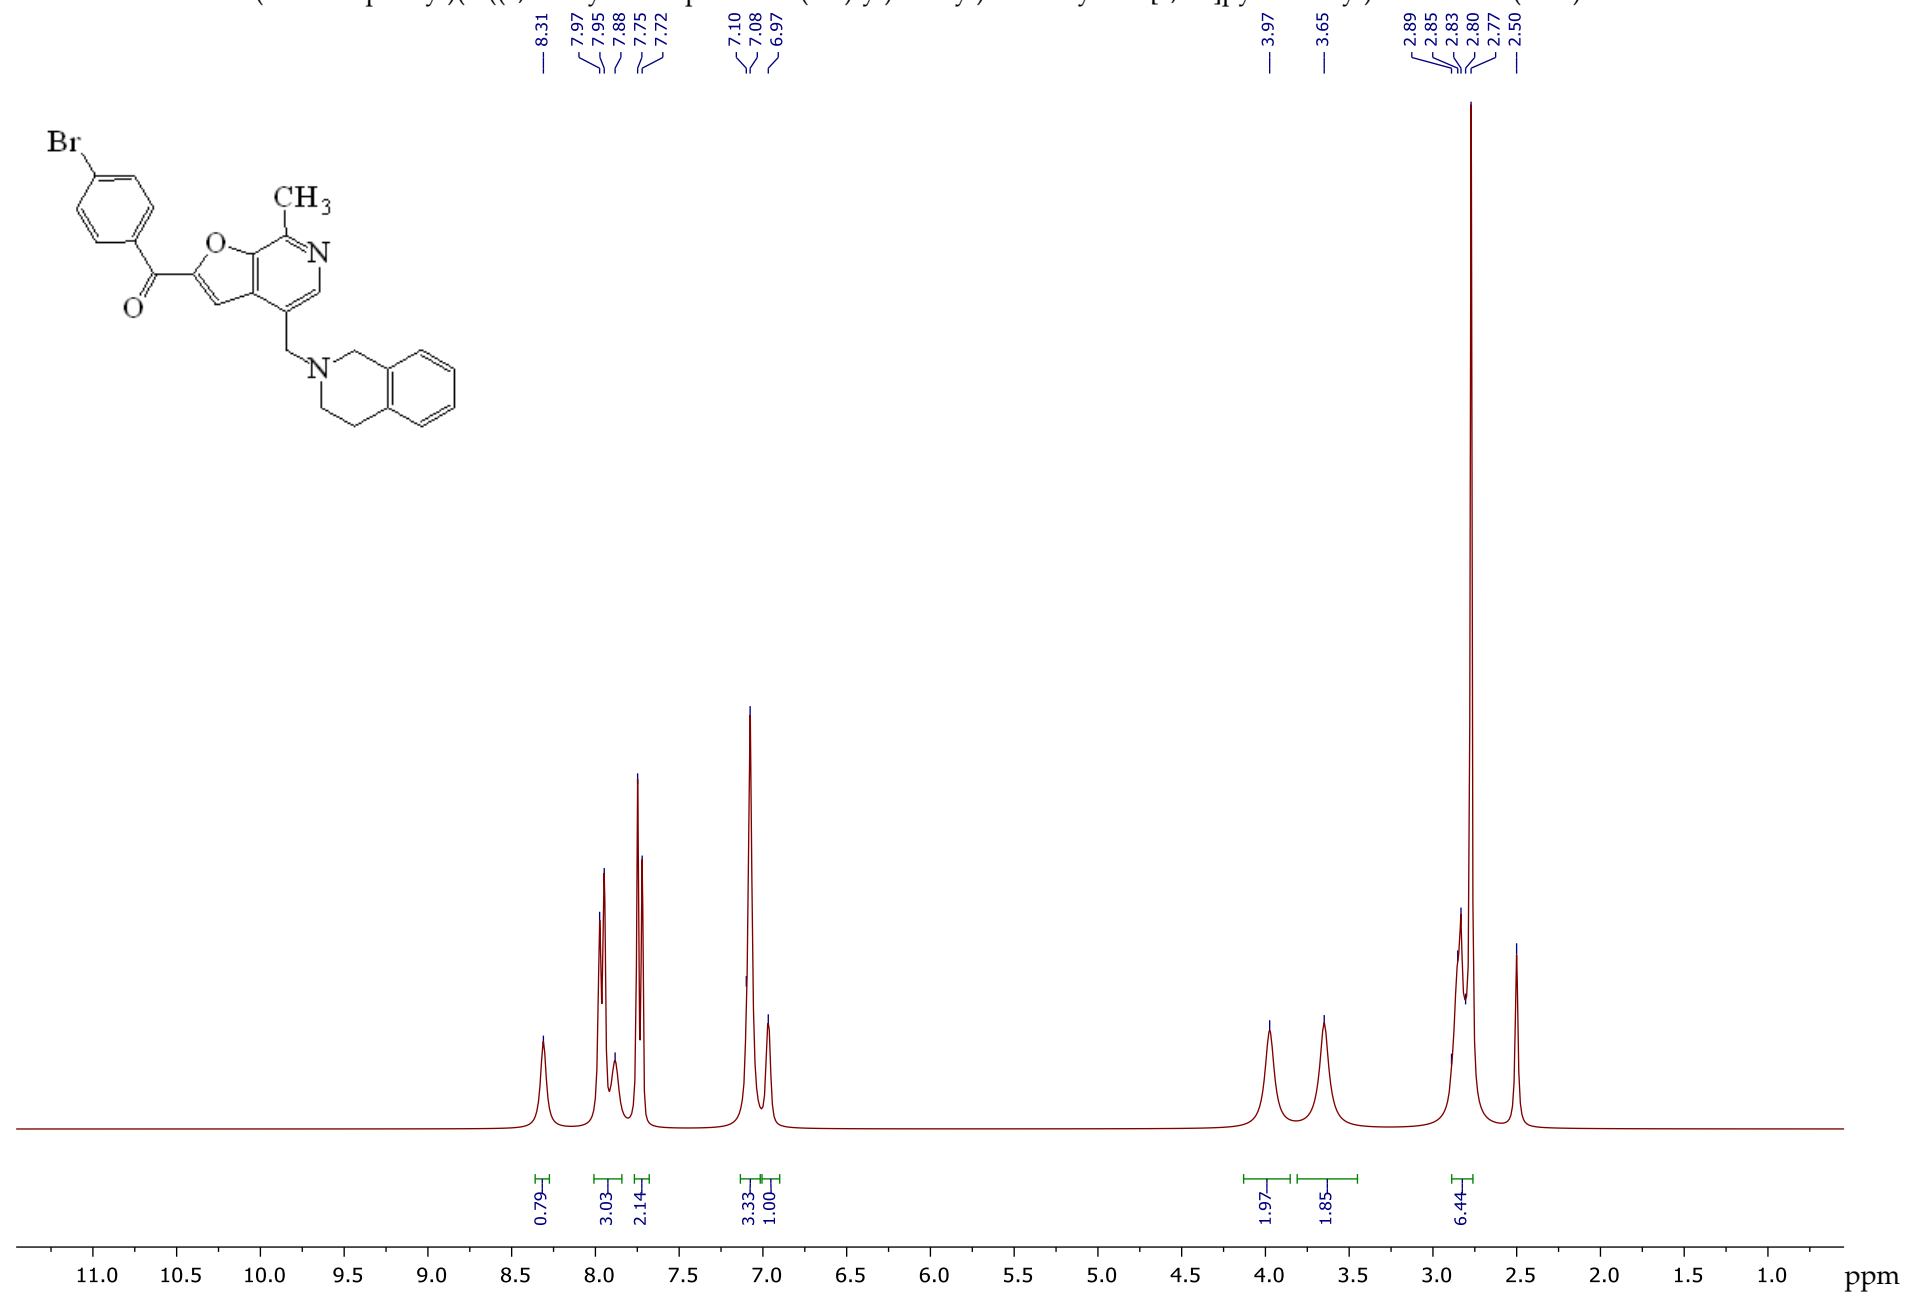

4-((2-(4-Bromobenzoyl)-7-methylfuro[2,3-c]pyridin-4-yl)methyl)piperazine-1-carbaldehyde hydrochloride (**PD9**).

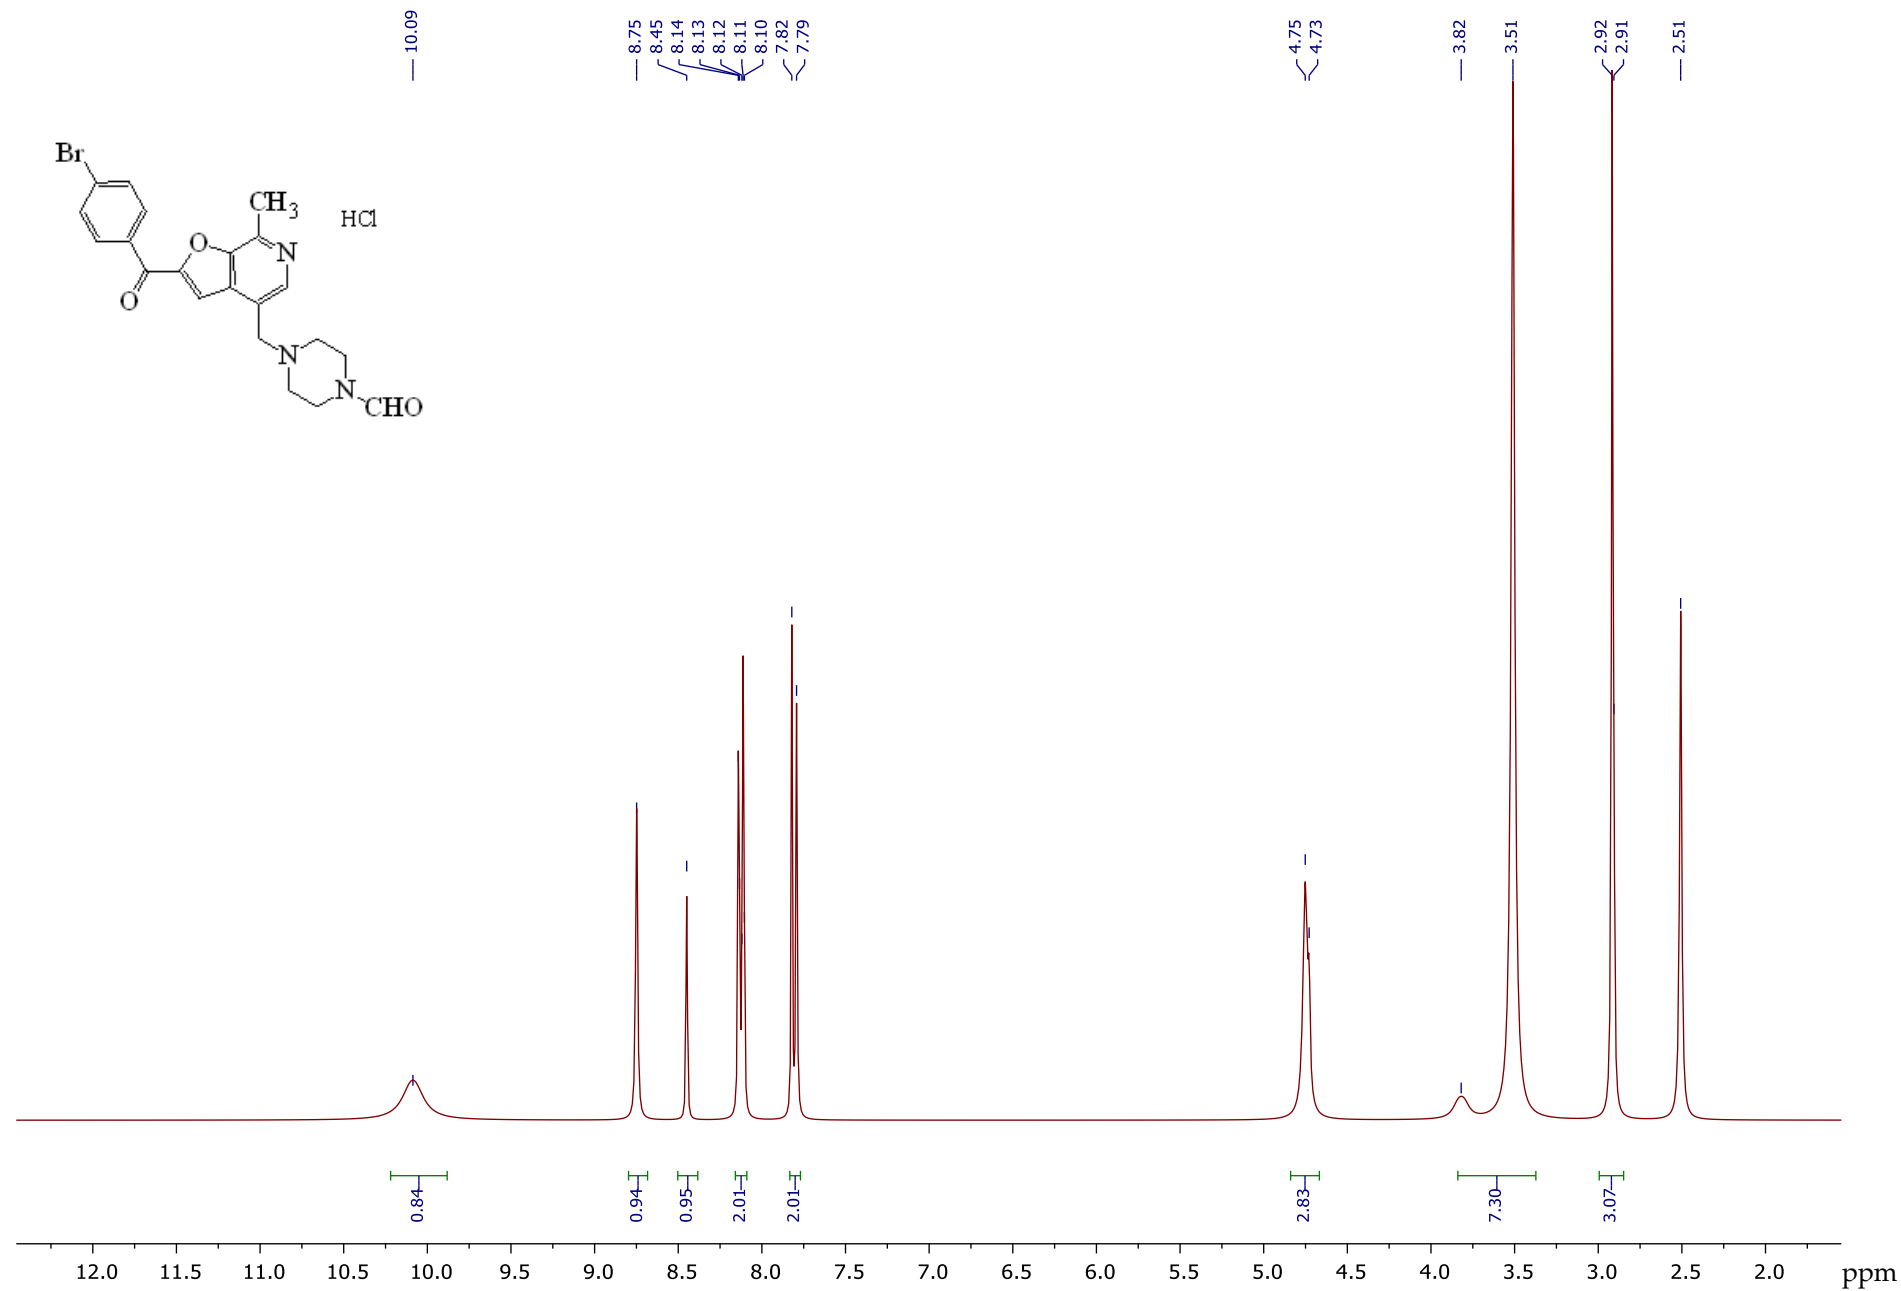

3-(4-((2-(4-Bromobenzoyl)-7-methylfuro[2,3-c]pyridin-4-yl)methyl)piperazin-1-yl)propanenitrile (**PD10**).

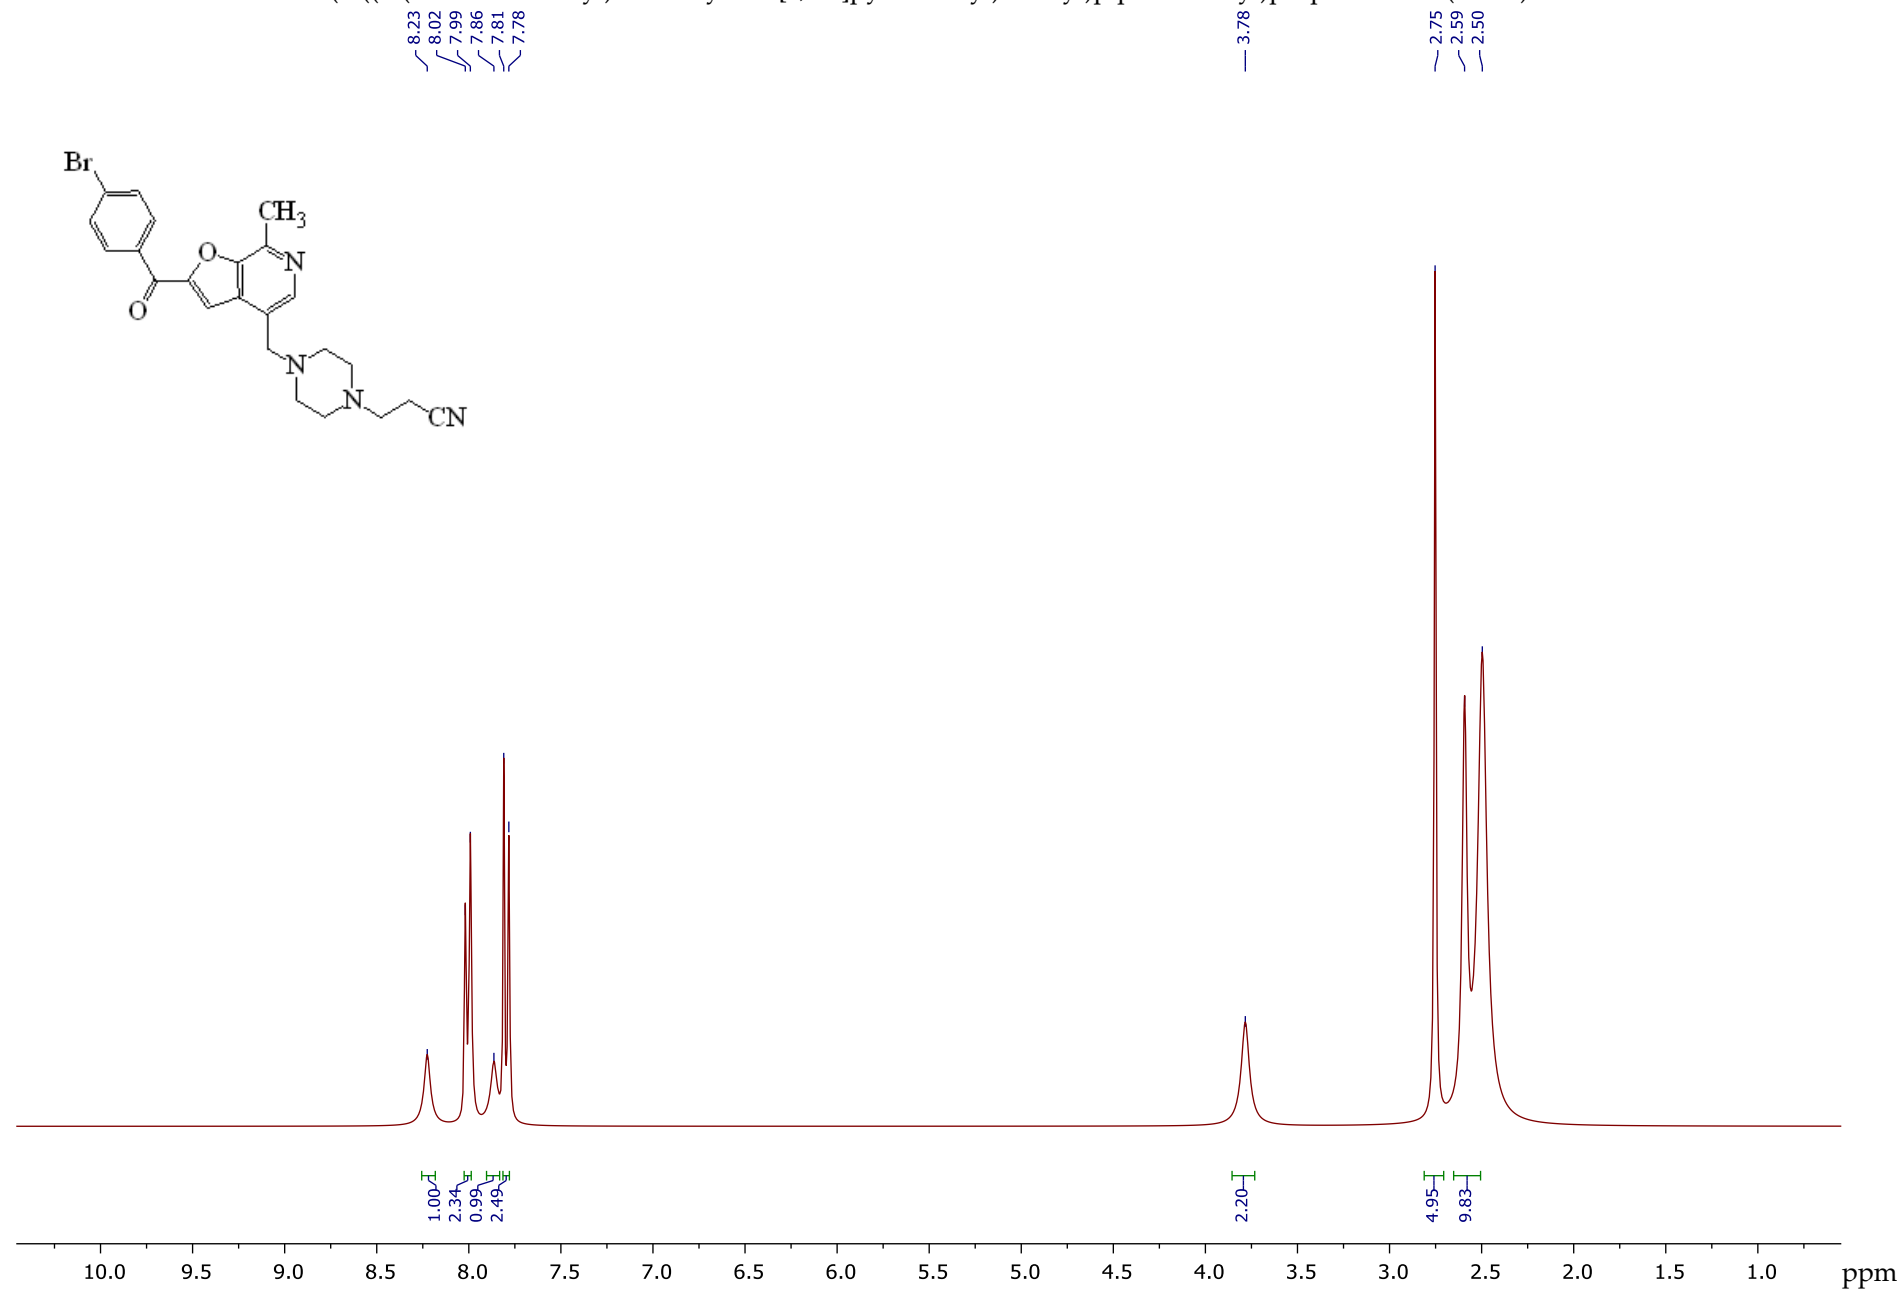

(4-Bromophenyl)(7-methyl-4-(((pyridin-3-ylmethyl)amino)methyl)furo[2,3-c]pyridin-2-yl)methanone dihydrochloride (**PD11**).

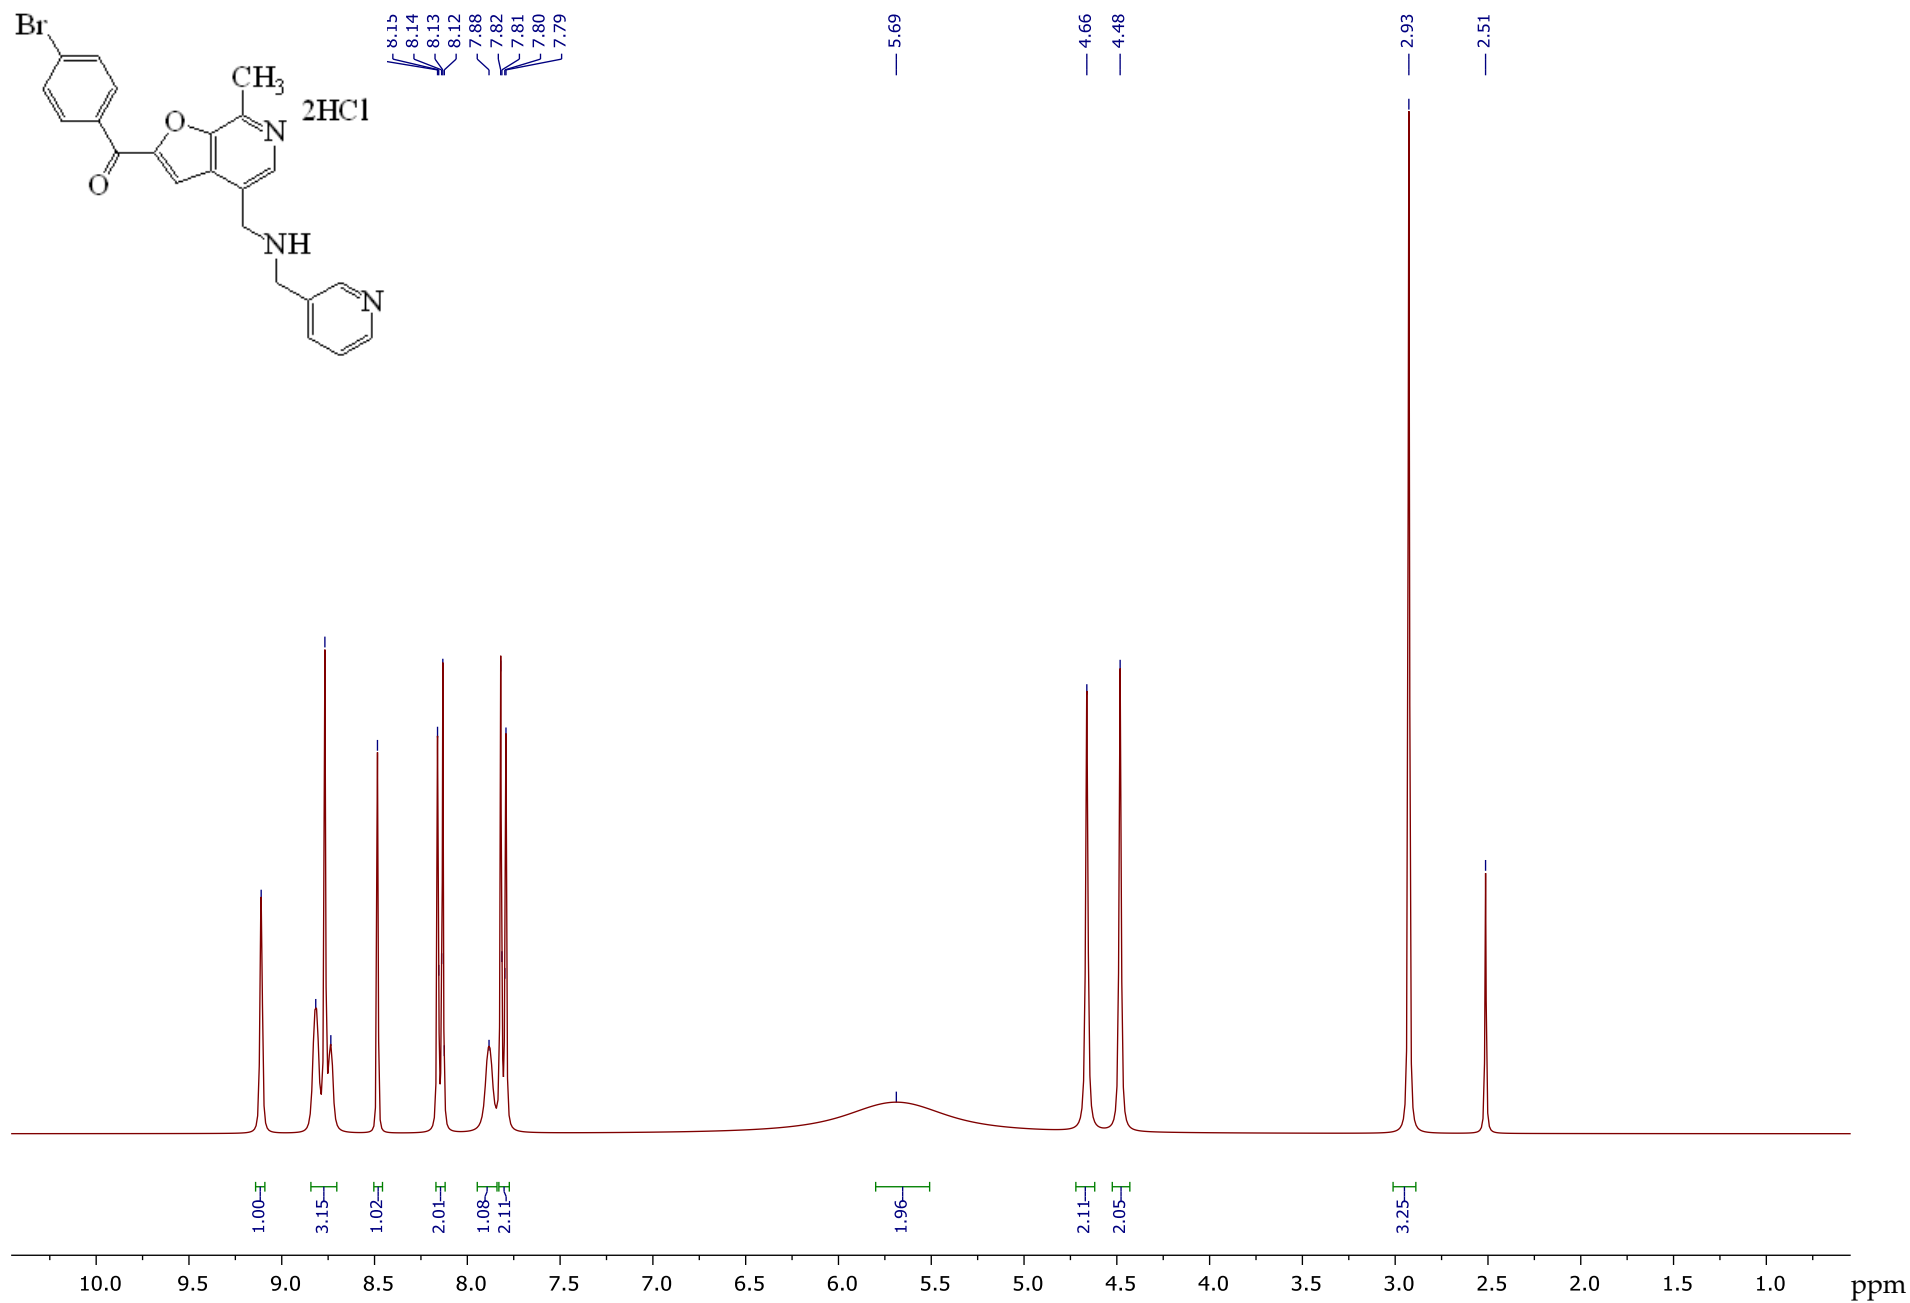

(1,4-Dihydrobenzo[d][1,2]dioxin-6-yl)(4-(((3,4-dimethoxybenzyl)amino)methyl)-7-methylfuro[2,3-c]pyridin-2-yl)methanone hydrochloride (**PD12**).

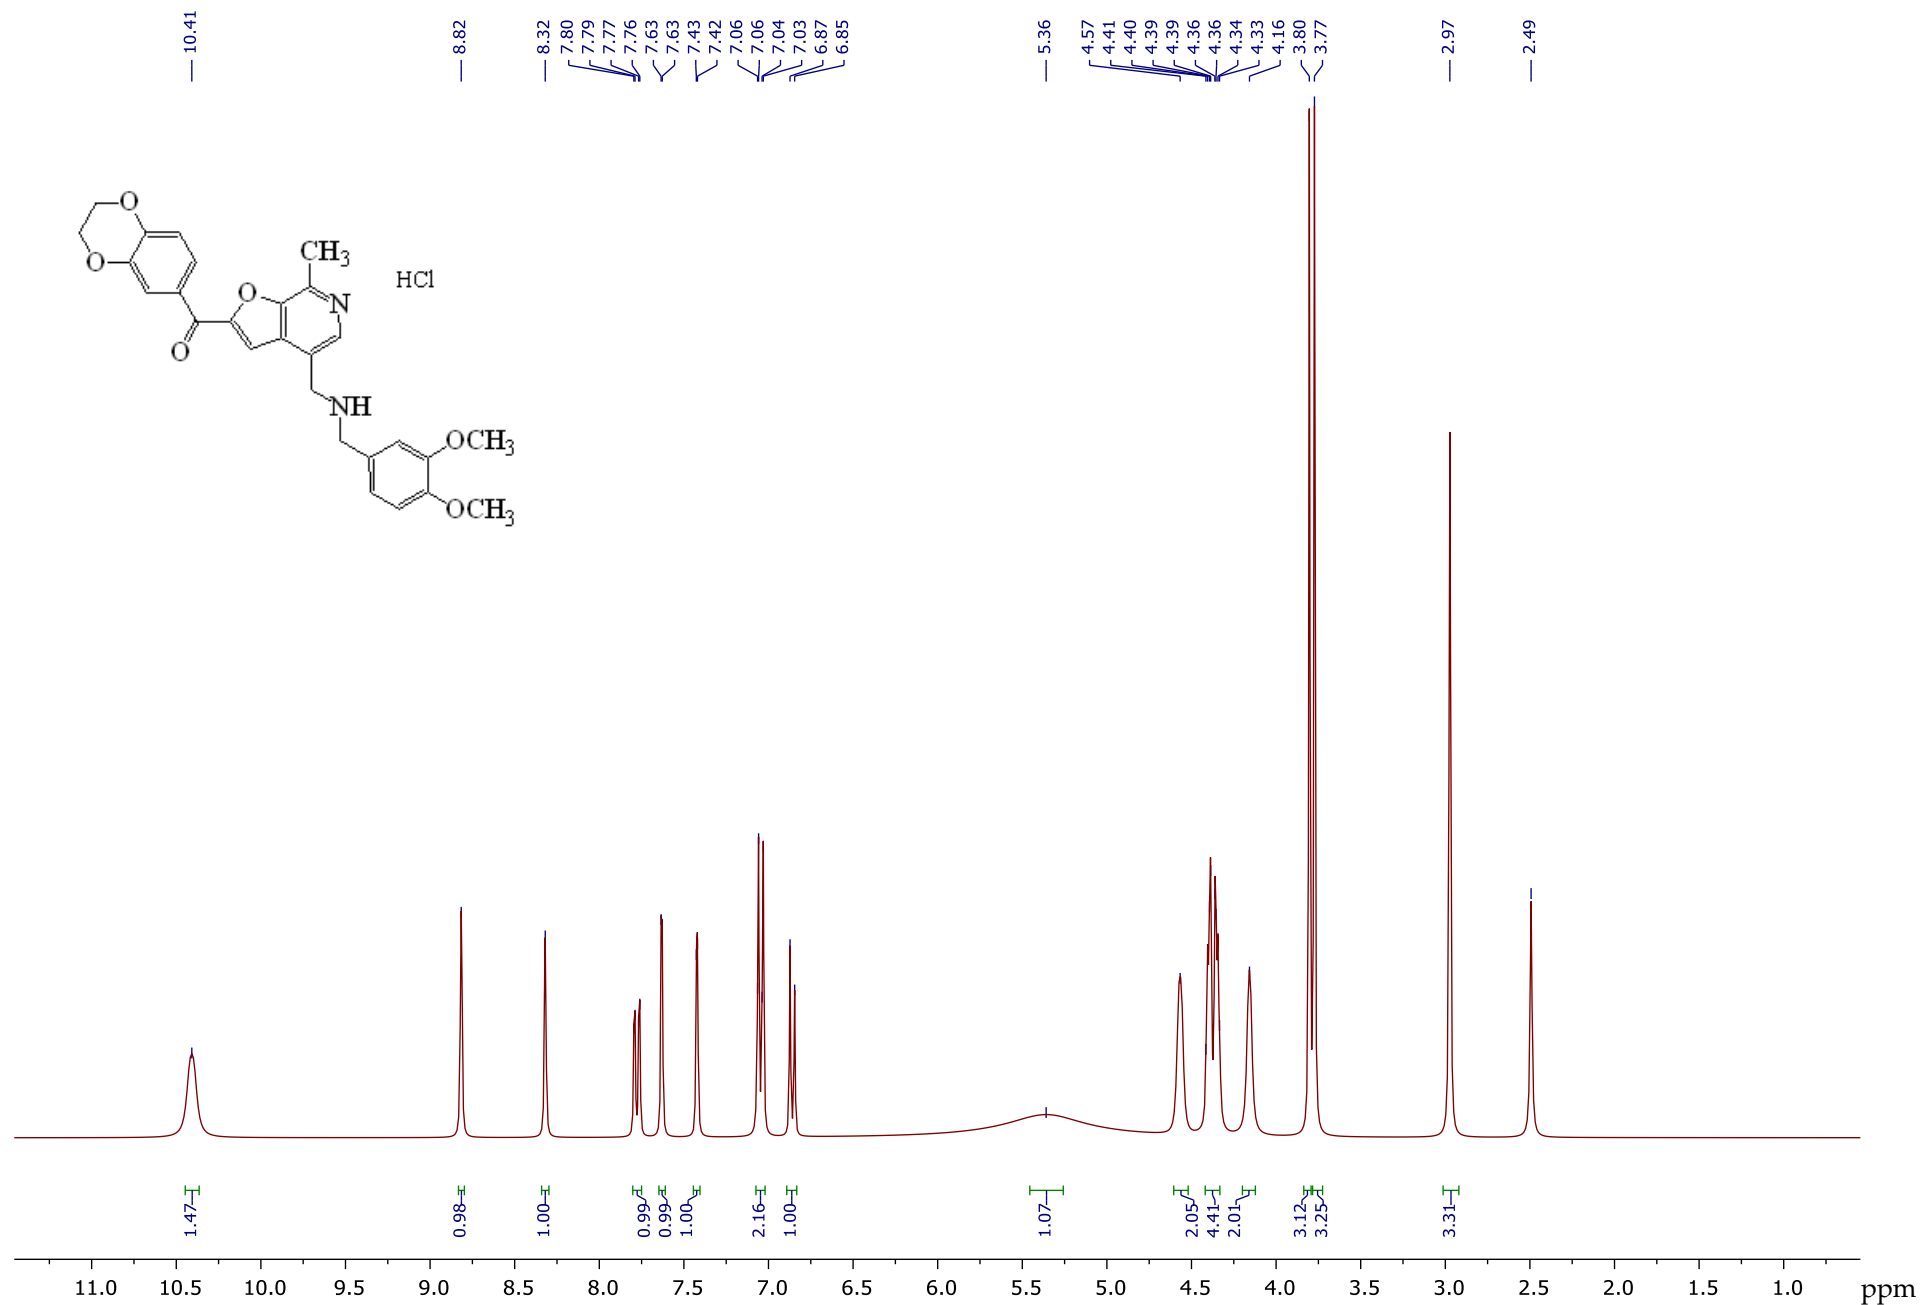

(1,4-Dihydrobenzo[d][1,2]dioxin-6-yl)(7-methyl-4-((4-(pyridin-3-ylmethyl)piperazin-1-yl)methyl)furo[2,3-c]pyridin-2-yl)methanone dihydrochloride (**PD13**).

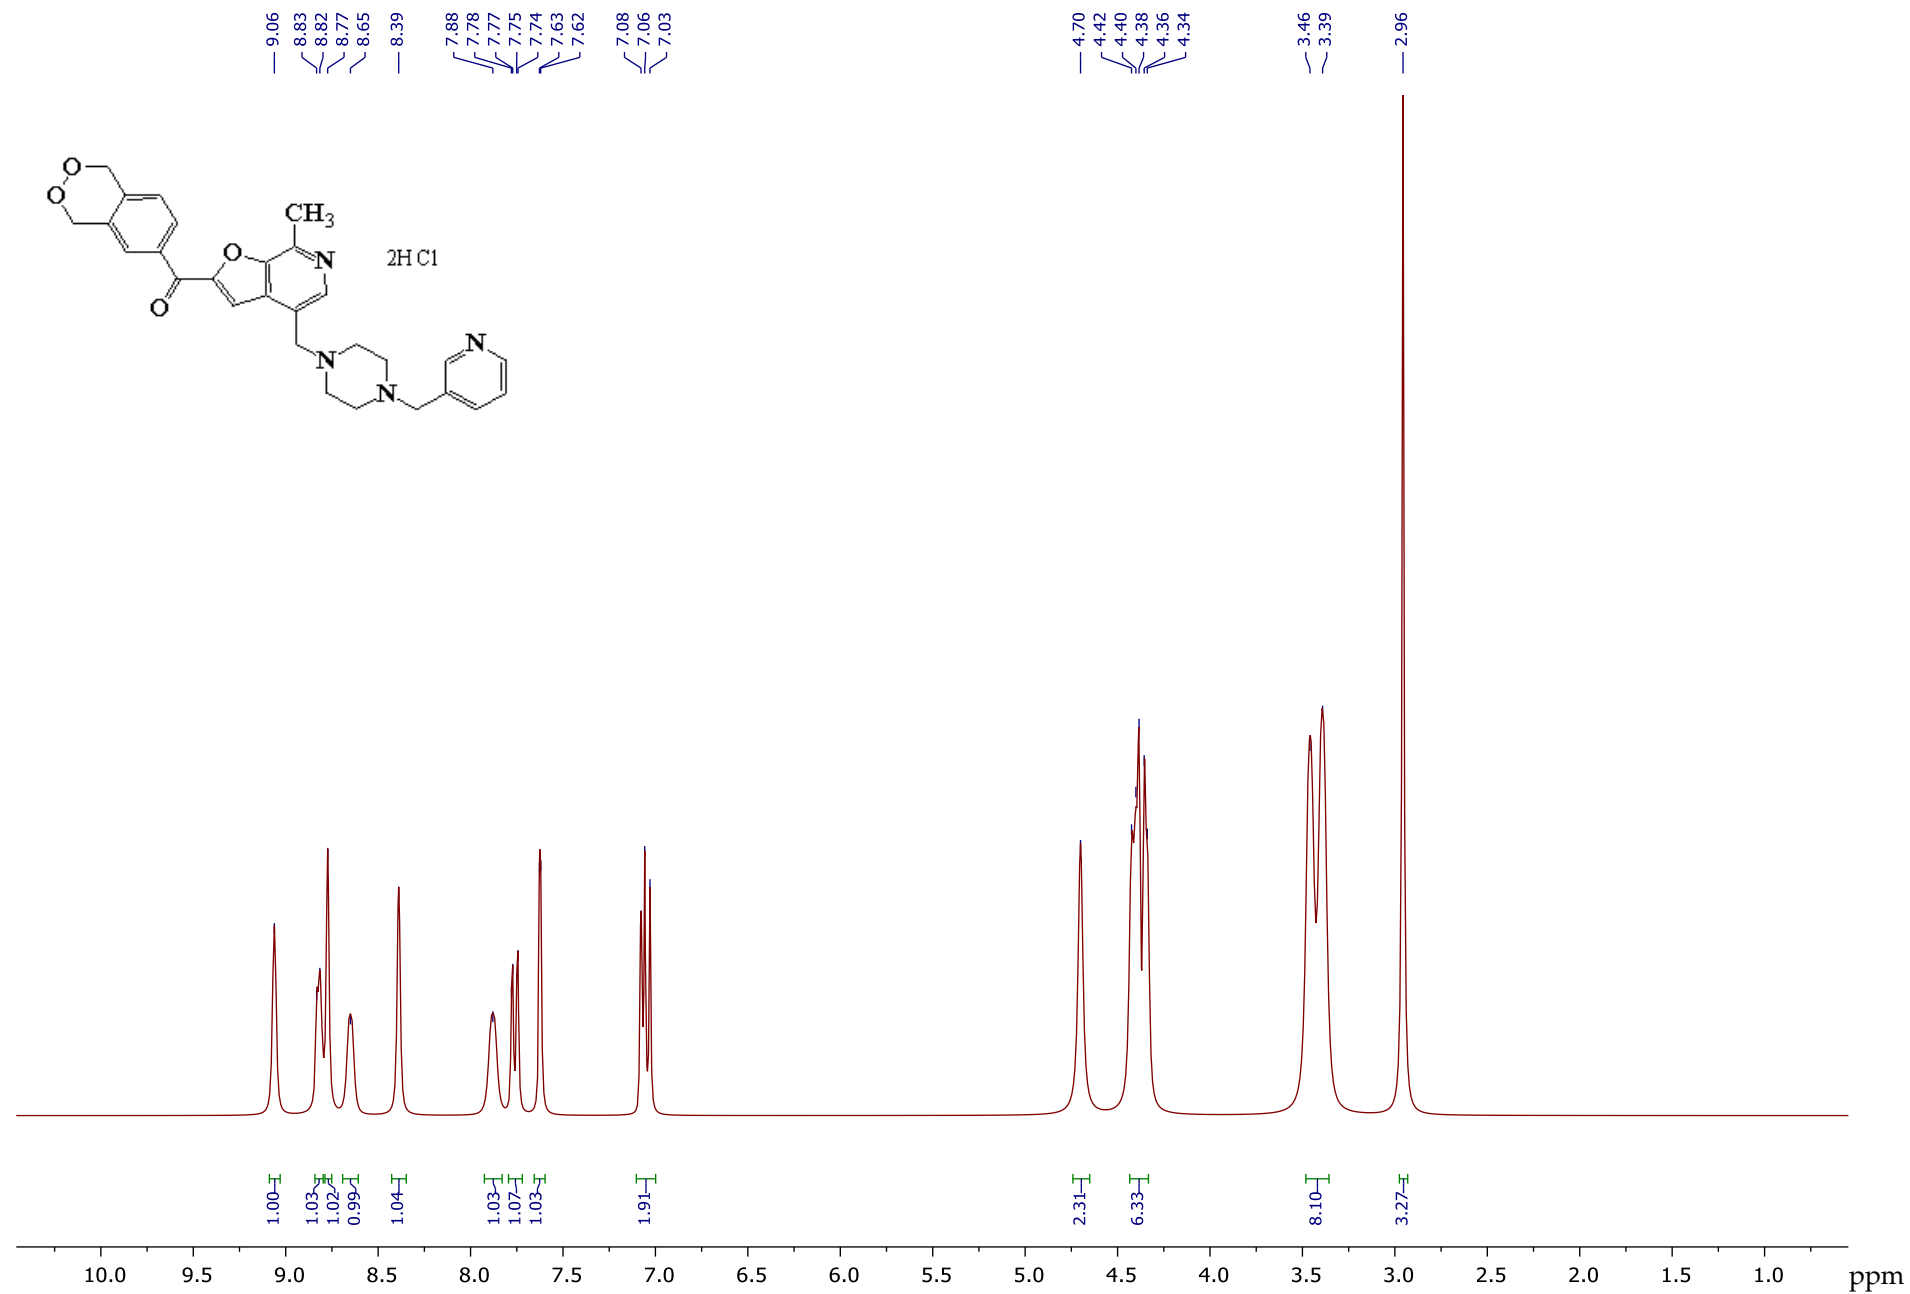

(1,4-Dihydrobenzo[d][1,2]dioxin-6-yl)(4-((4-(2-hydroxyethyl)piperazin-1-yl)methyl)-7-methylfuro[2,3-c]pyridin-2-yl)methanone dihydrochloride (**PD14**).

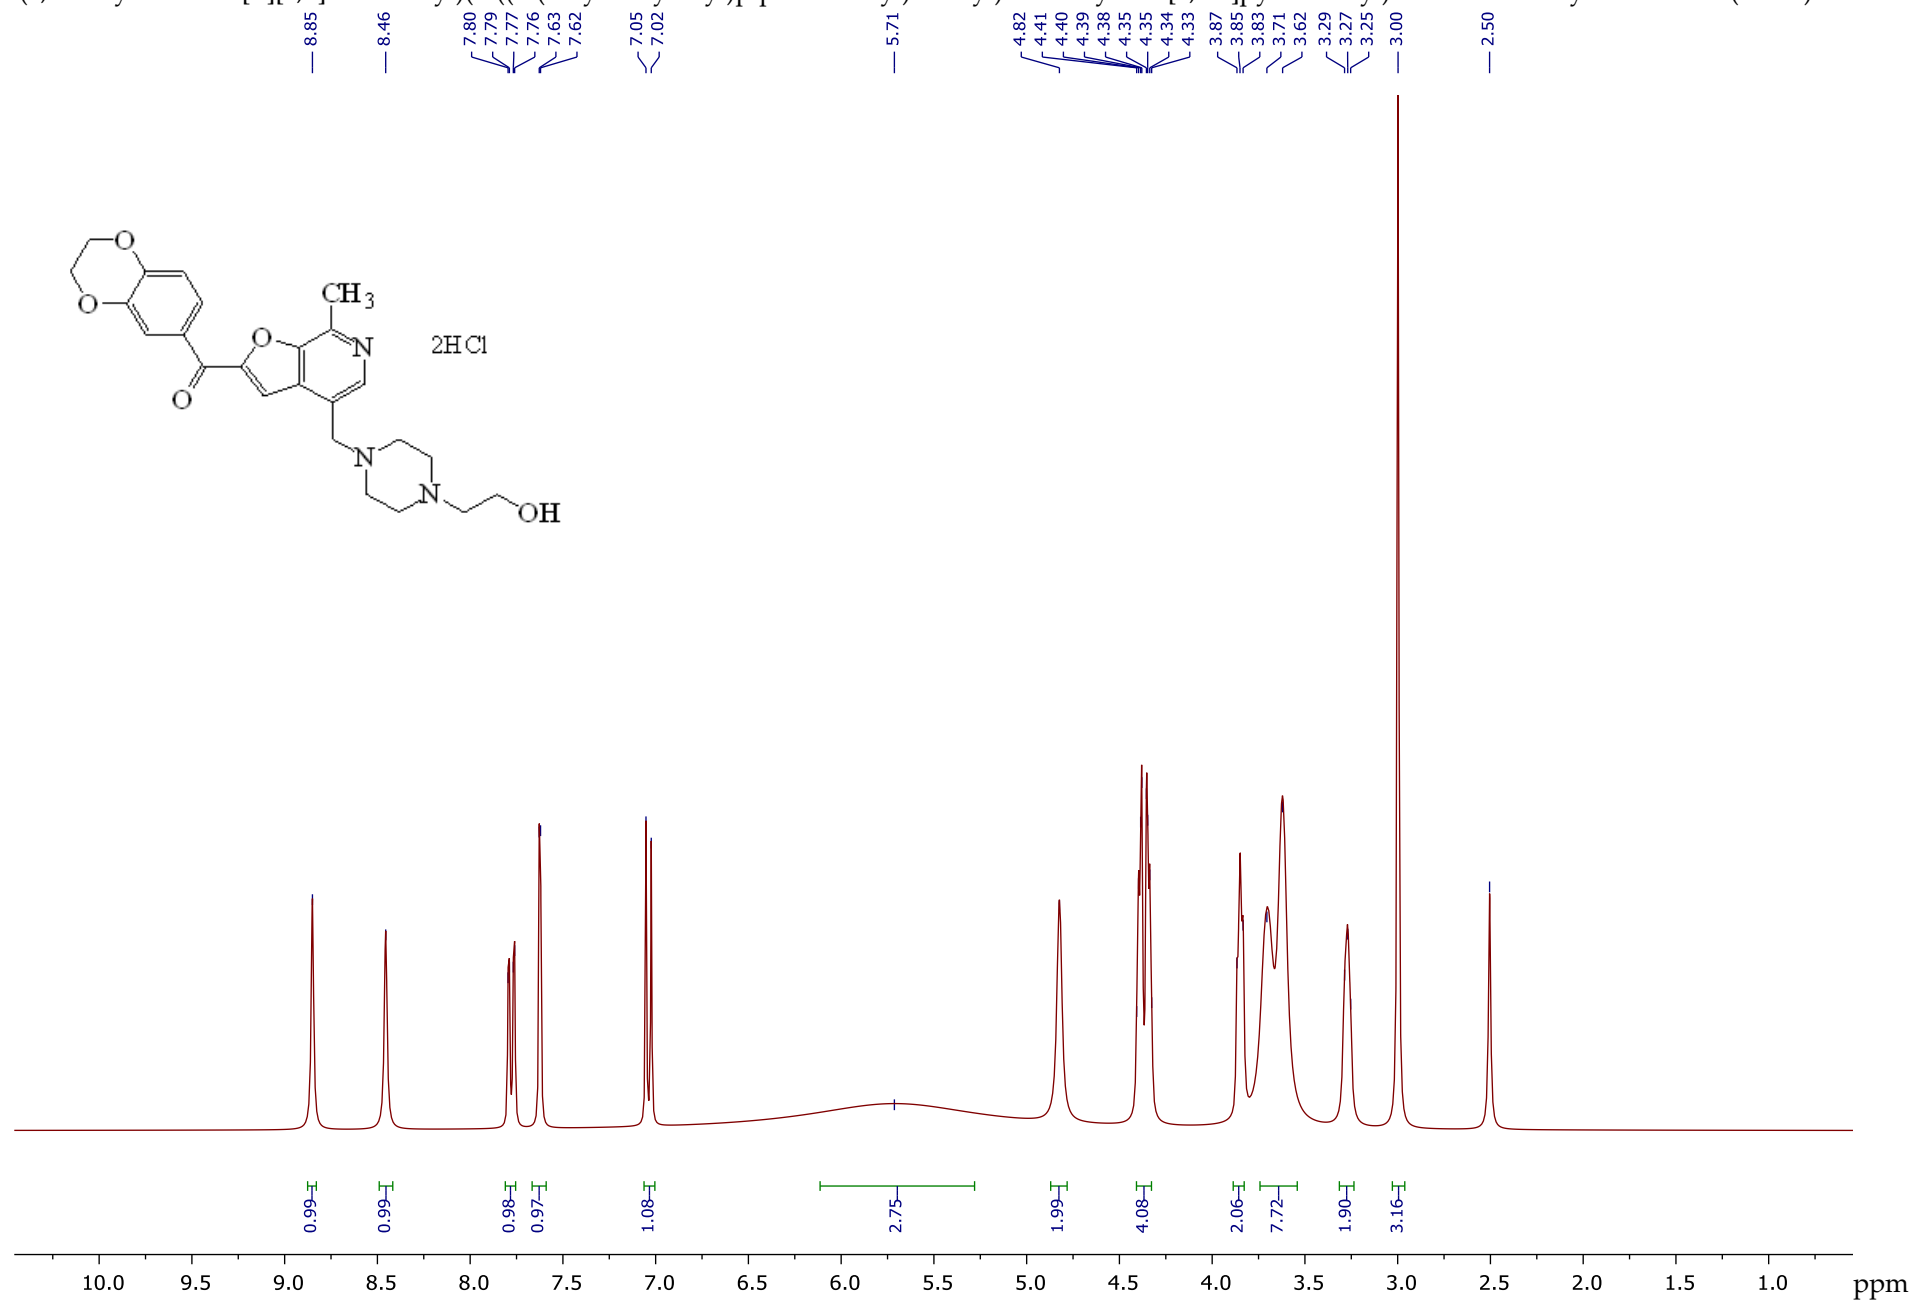

<sup>13</sup>C NMR Spectra of compounds PD1-PD14.  
[4-(Hydroxymethyl)-7-methylfuro[2,3-c]pyridin-2-yl](4-methoxyphenyl)methanone (PD1).

PD1

Sample Name:  
PD1  
Data Collected on:  
mercury400-mercury400  
Archive directory:  
/home/vnmr1/vnmrsys/data  
Sample directory:  
PD1\_20221001\_01  
FidFile: current

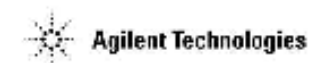

Pulse Sequence: CARBON (s2pul)  
Solvent: dmsd  
Data collected on: Oct 1 2022

Temp. 25.0 C / 298.1 K  
Operator: vnmr1

Relax. delay 1.000 sec  
Pulse 45.0 degrees  
Acq. time 1.550 sec  
Width 21141.6 Hz  
1152 repetitions  
OBSERVE C13, 100.6243820 MHz  
DECOUPLE H1, 400.1779555 MHz  
Power 38 dB  
continuously on  
WALTZ-16 modulated  
DATA PROCESSING  
Line broadening 0.5 Hz  
FT size 65536  
Total time 1 hr, 50 min

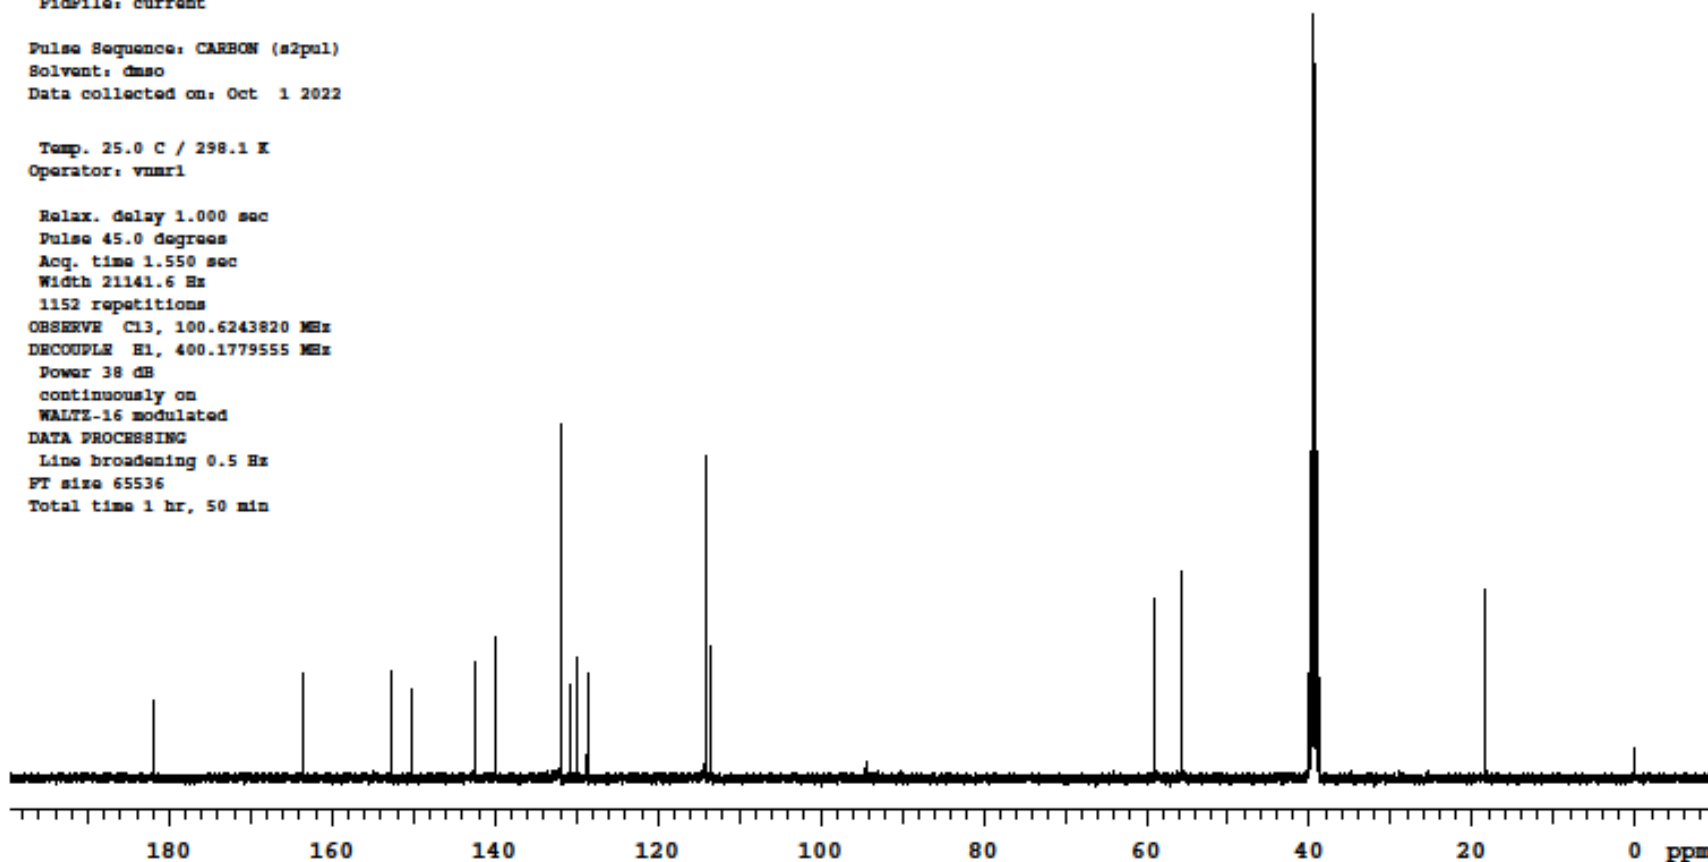



(1,4-Dihydrobenzo[d][1,2]dioxin-6-yl)(4-(hydroxymethyl)-7-methylfuro[2,3-c]pyridin-2-yl)methanone (PD2)

PD2

Sample Name:  
PD2  
Data Collected on:  
mercury400-mercury400  
Archive directory:  
/home/vnmr1/vnmrsys/data  
Sample directory:  
PD2\_20220925\_01  
FidFile: CARBON\_01

Pulse Sequence: CARBON (s2pul)  
Solvent: dmsc  
Data collected on: Sep 25 2022

Temp. 25.0 C / 298.1 K  
Operator: vnmr1

Relax. delay 1.000 sec  
Pulse 45.0 degrees  
Acq. time 1.419 sec  
Width 23094.7 Hz  
2512 repetitions  
OBSERVE C13, 100.6243836 MHz  
DECOUPLE H1, 400.1779555 MHz  
Power 38 dB  
continuously on  
WALTZ-16 modulated  
DATA PROCESSING  
Line broadening 0.5 Hz  
FT size 65536  
Total time 1 hr, 45 min

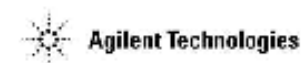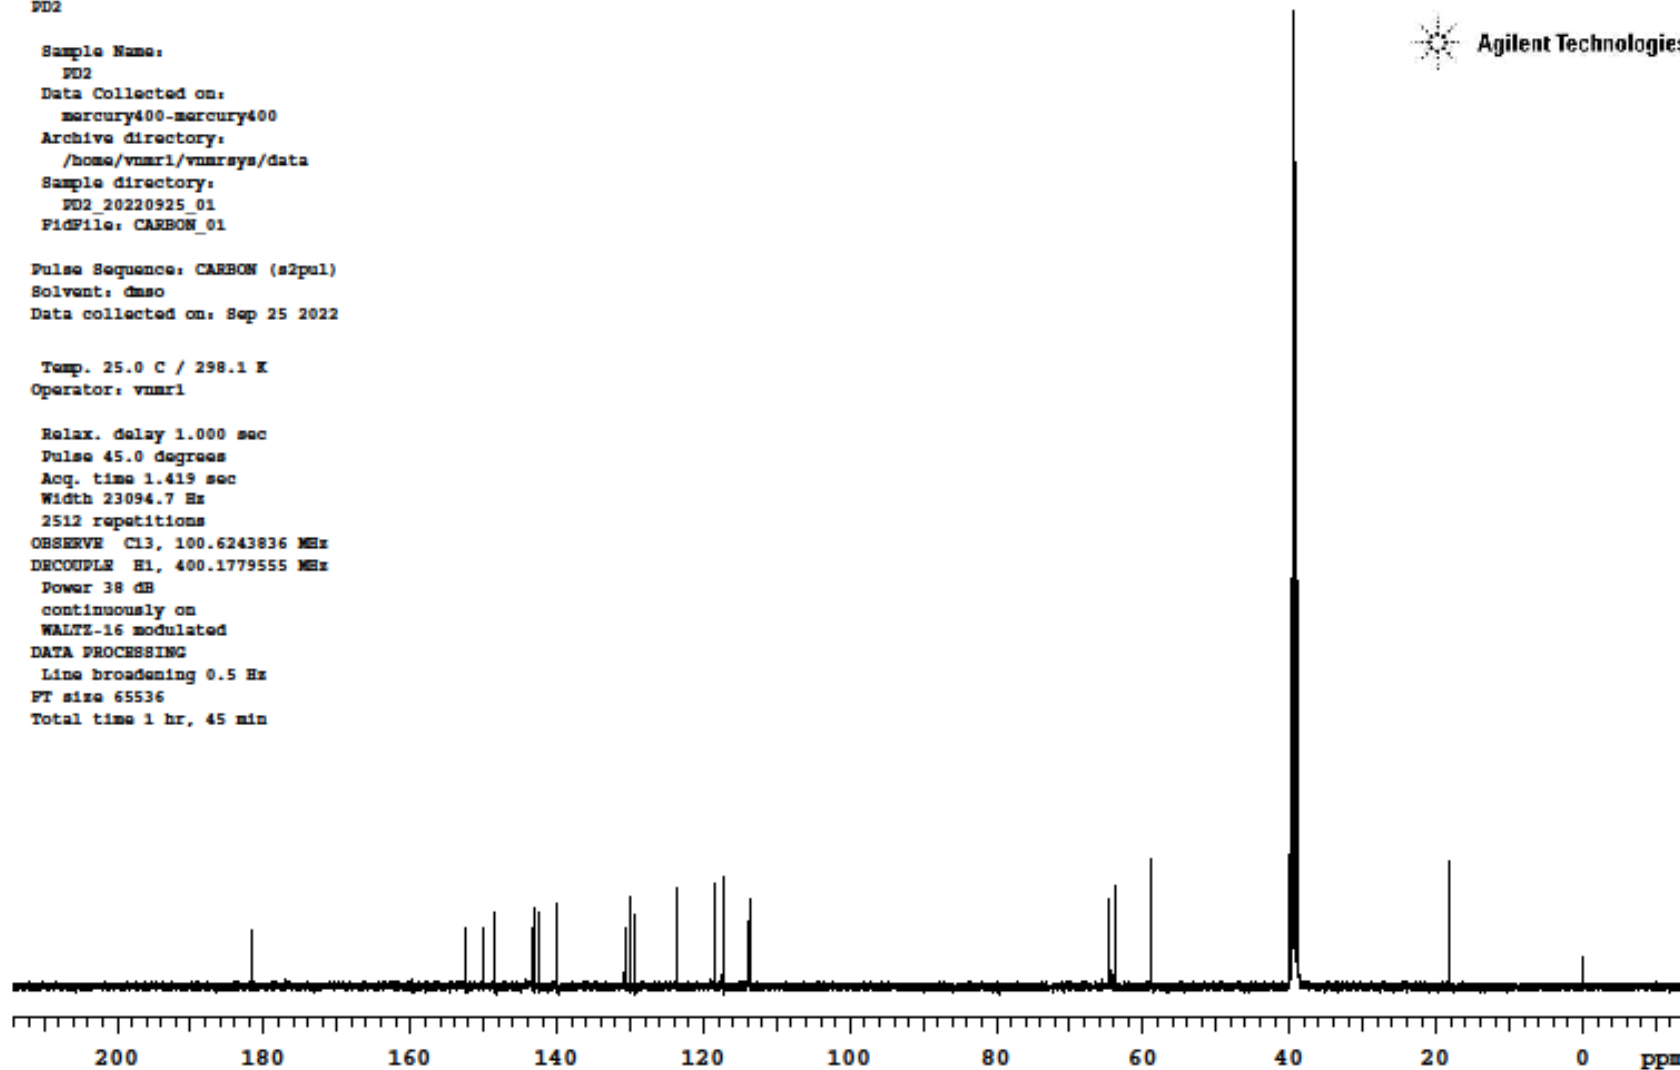

(4-Bromophenyl){7-methyl-4-[(4-(pyridin-2-ylmethyl)piperazin-1-yl)methyl]furo[2,3-c]pyridin-2-yl)methanone dihydrochloride (PD3).

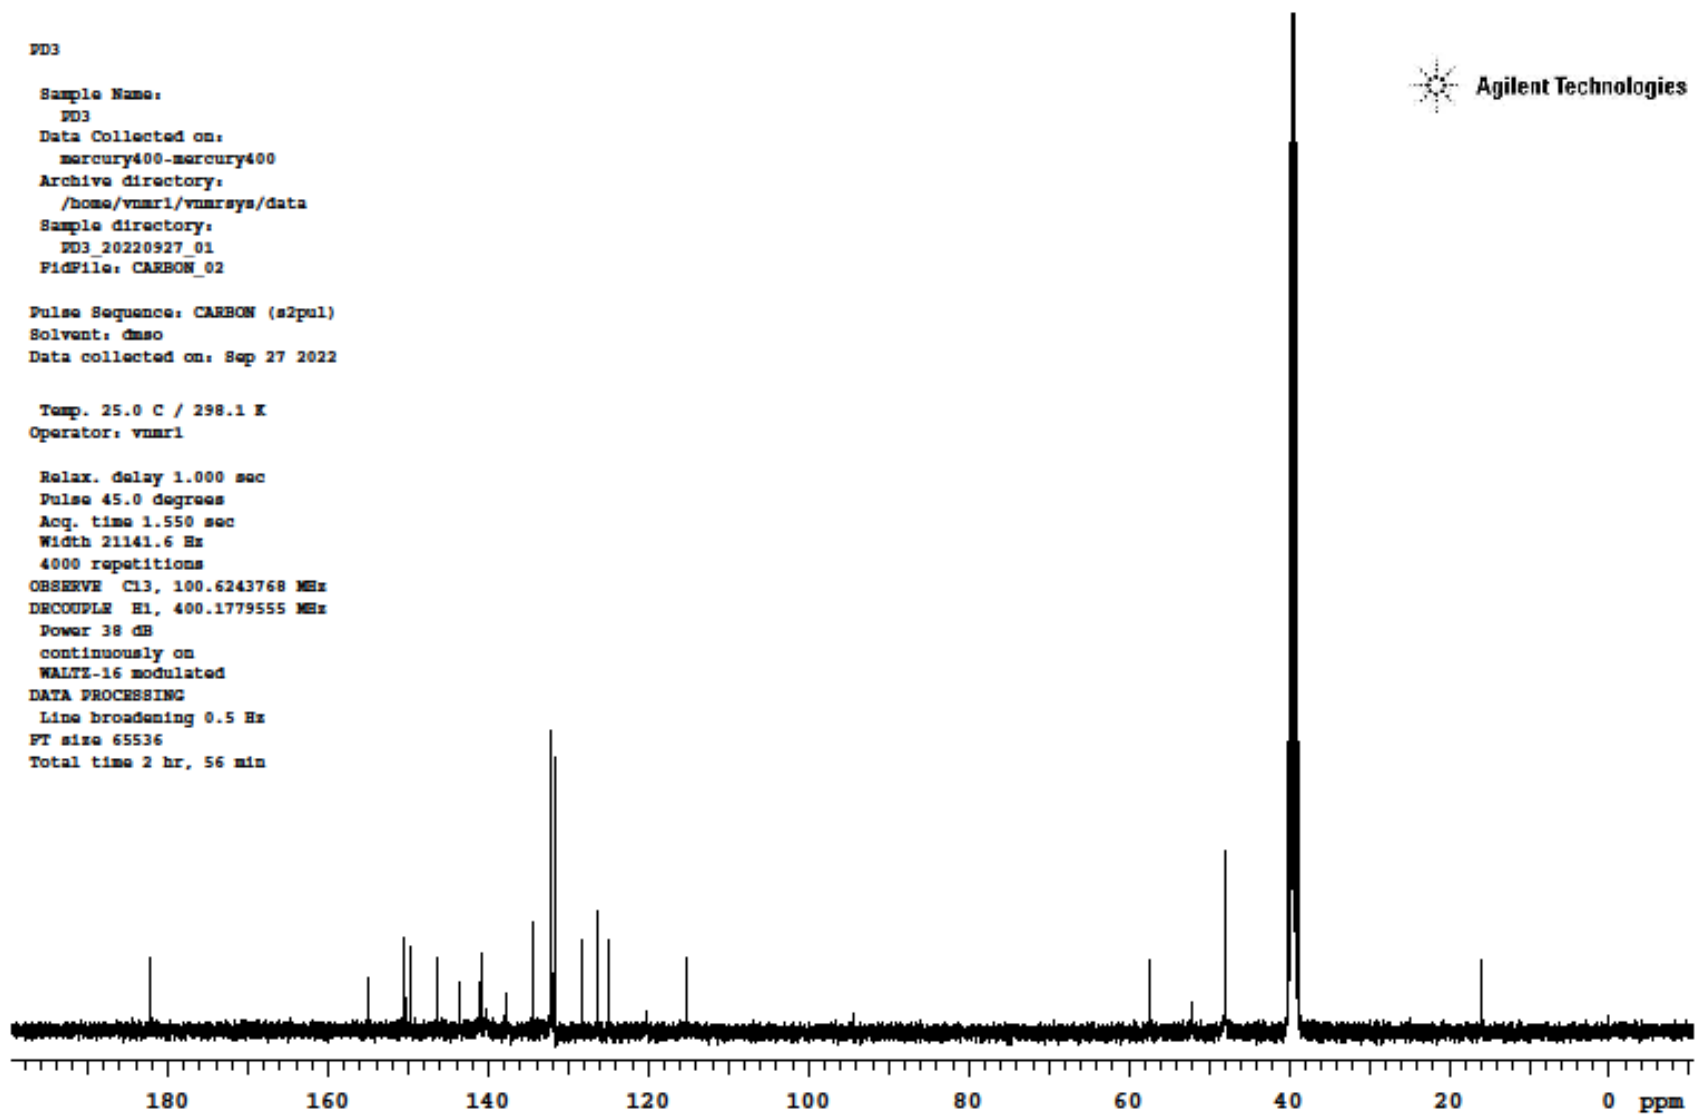

4-Bromophenyl(7-methyl-4-((4-(pyridin-3-ylmethyl)piperazin-1-yl)methyl)furo[2,3-c]pyridin-2-yl)methanone (**PD4**).

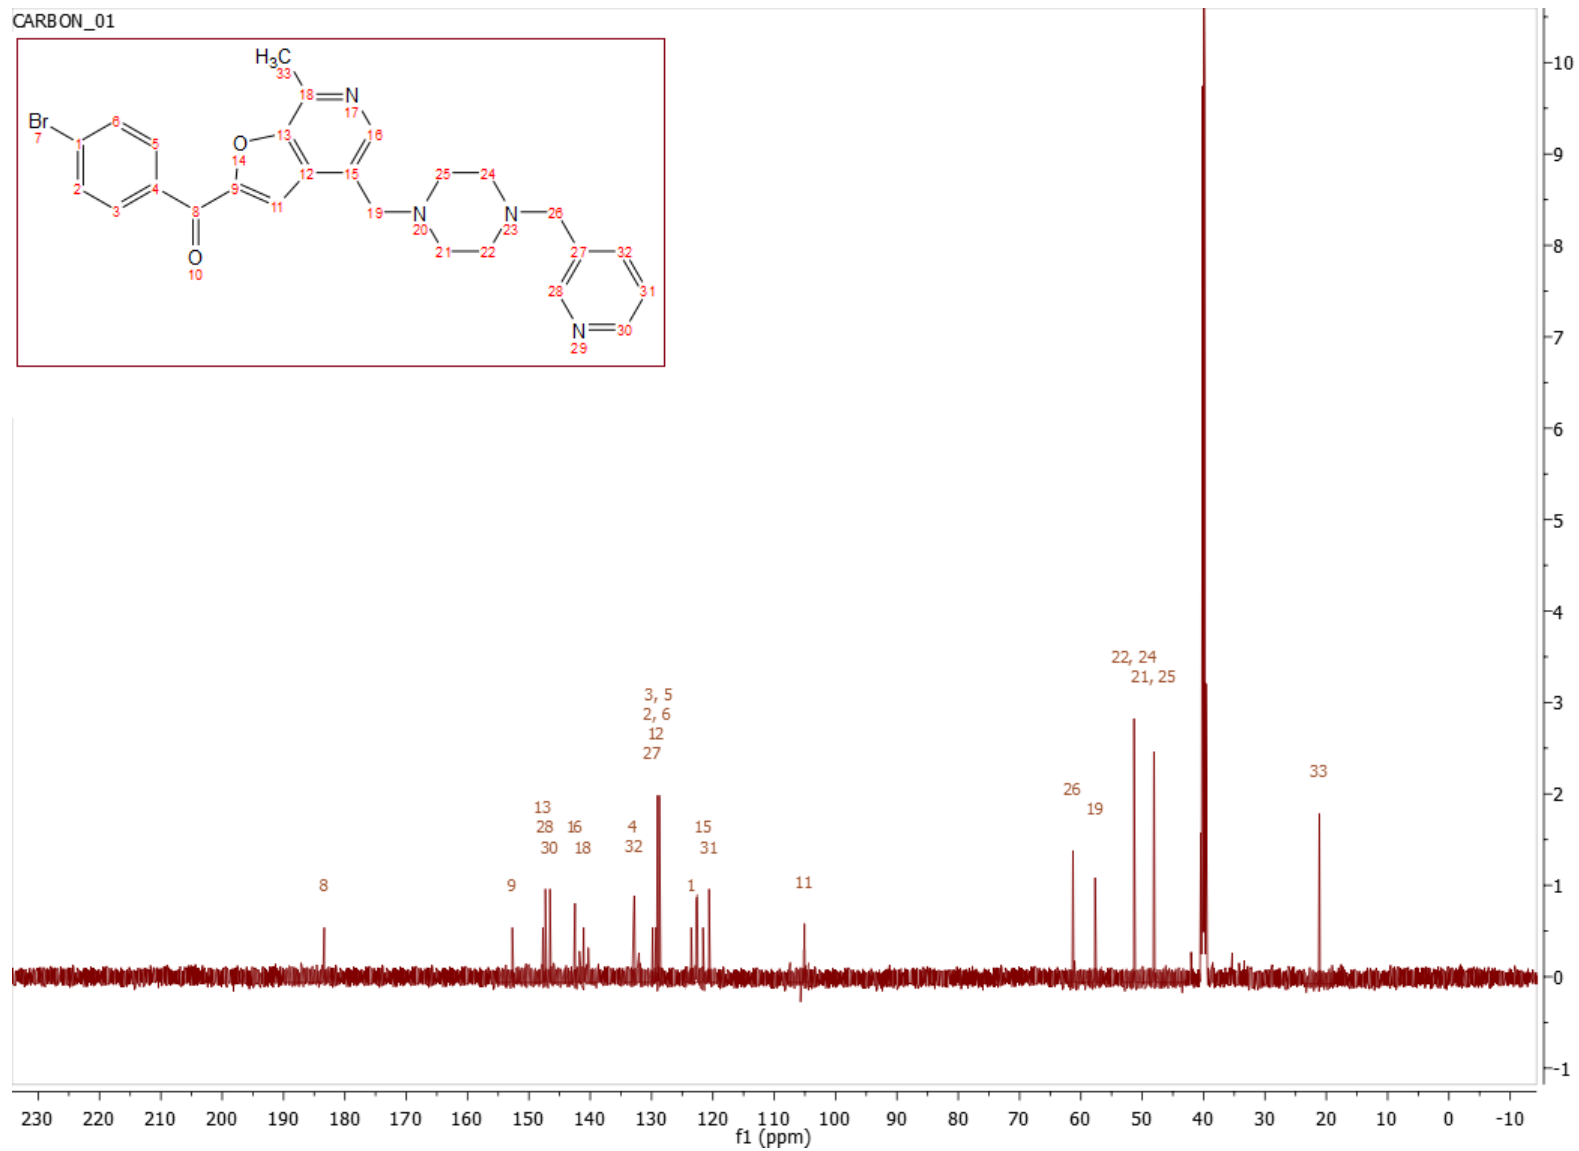

(4-((1H-Imidazol-1-yl)methyl)-7-methylfuro[2,3-c]pyridin-2-yl)(4-bromophenyl)methanone hydrochloride (PD5).

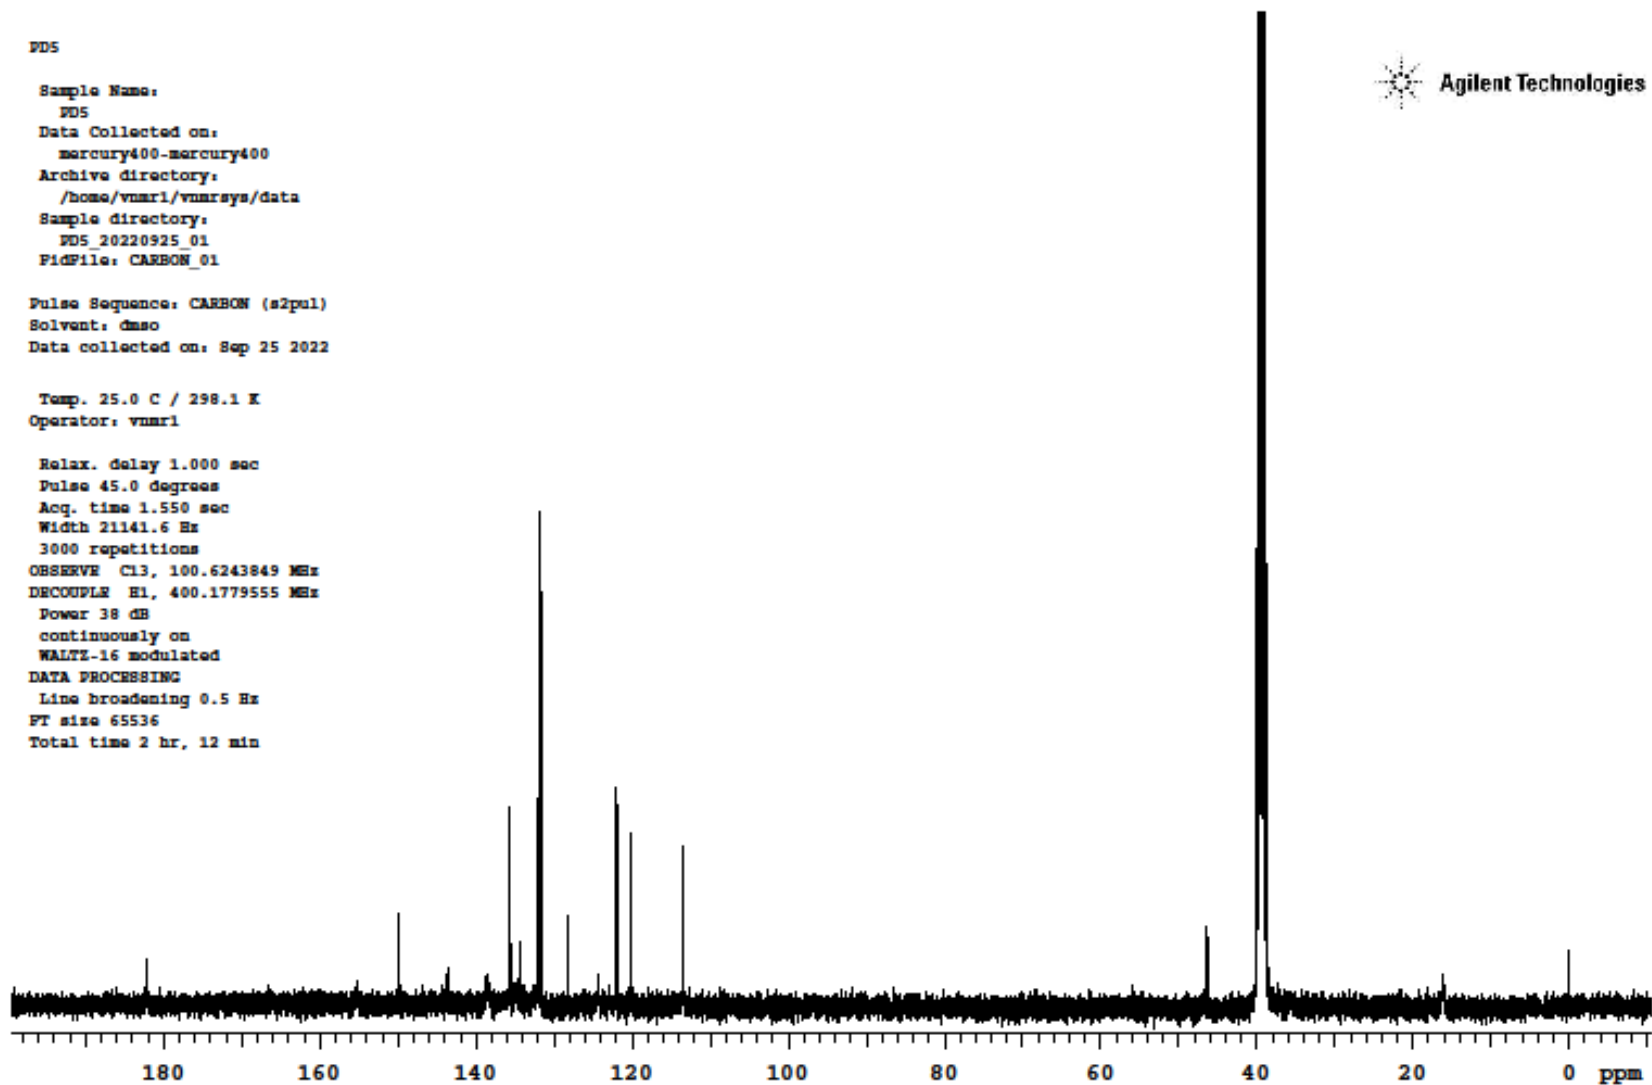

4-Bromophenyl)(4-((4-(2-hydroxyethyl)piperazin-1-yl)methyl)-7-methylfuro[2,3-c]pyridin-2-yl)methanone (PD6).

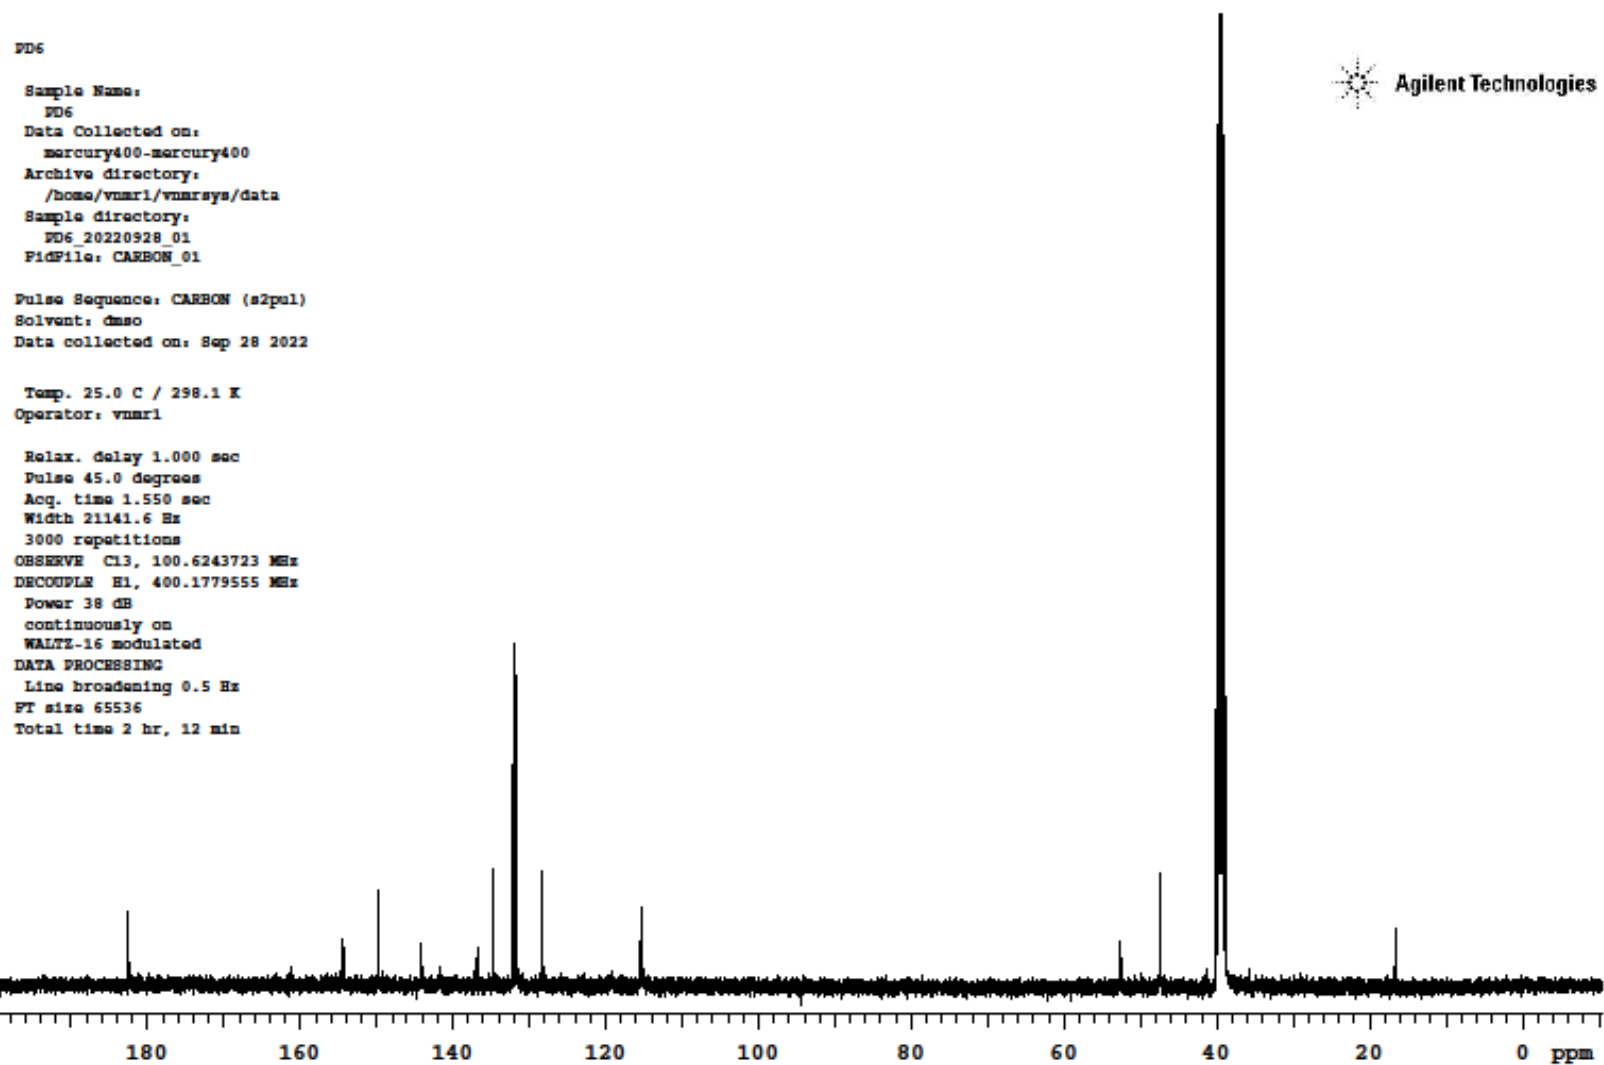

(4-Bromophenyl)(4-((4,5-dichloro-1H-imidazol-1-yl)methyl)-7-methylfuro[2,3-c]pyridin-2-yl)methanone (PD7).

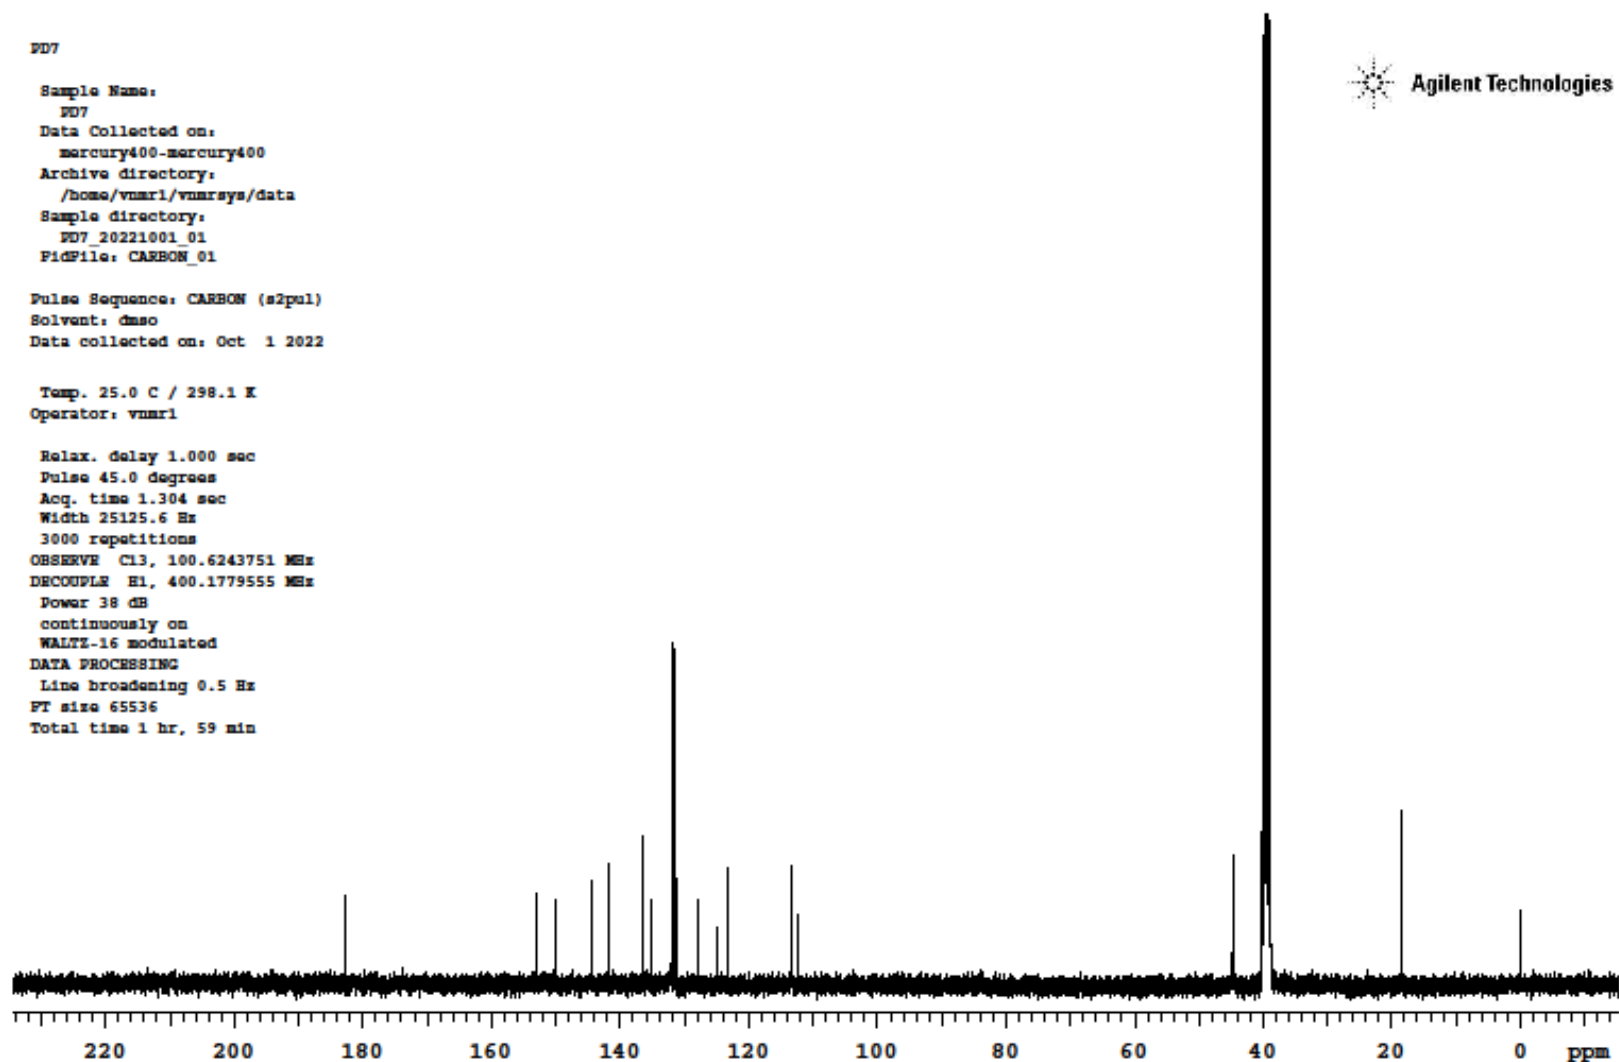

(4-Bromophenyl)(4-((3,4-dihydroisoquinolin-2(1H)-yl)methyl)-7-methylfuro[2,3-c]pyridin-2-yl)methanone (PD8).

PD8

Sample Name:  
PD8  
Data Collected on:  
mercury400-mercury400  
Archive directory:  
/home/vnmr1/vnmrsys/data  
Sample directory:  
PD8\_20220927\_01  
FidFile: CARBON\_01

Pulse Sequence: CARBON (s2pul)  
Solvent: dmsc  
Data collected on: Sep 27 2022

Temp. 25.0 C / 298.1 K  
Operator: vnmr1

Relax. delay 1.000 sec  
Pulse 45.0 degrees  
Acq. time 1.550 sec  
Width 21141.6 Hz  
2512 repetitions  
OBSERVE C13, 100.6243742 MHz  
DECOUPLE H1, 400.1779555 MHz  
Power 38 dB  
continuously on  
WALTZ-16 modulated  
DATA PROCESSING  
Line broadening 0.5 Hz  
FT size 65536  
Total time 1 hr, 50 min

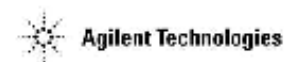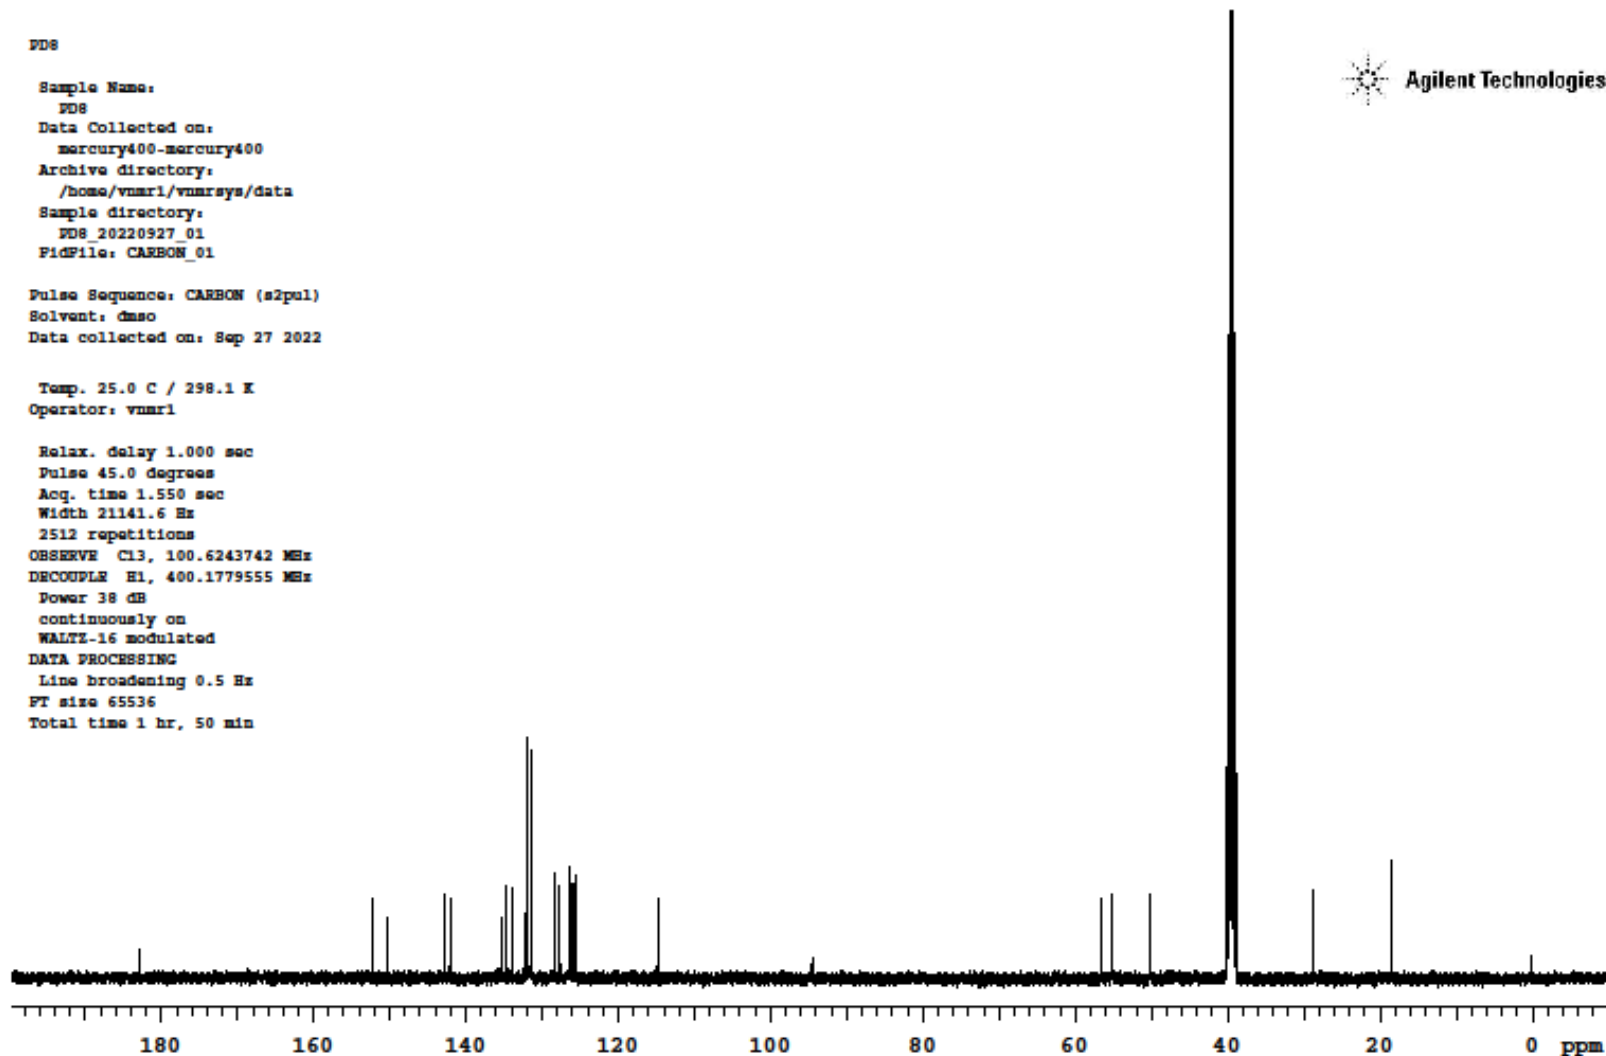

3-((2-(4-Bromobenzoyl)-7-methylfuro[2,3-c]pyridin-4-yl)methyl)piperazine-1-carbaldehyde hydrochloride (PD9).

PD9

Sample Name:  
PD9  
Data Collected on:  
mercury400-mercury400  
Archive directory:  
/home/vnmr1/vnmrsys/data  
Sample directory:  
PD9\_20220928\_01  
FidFile: CARBON\_01

Pulse Sequence: CARBON (s2pul)  
Solvent: dmsc  
Data collected on: Sep 28 2022

Temp. 25.0 C / 298.1 K  
Operator: vnmr1

Relax. delay 1.000 sec  
Pulse 45.0 degrees  
Acq. time 1.550 sec  
Width 21141.6 Hz  
2512 repetitions  
OBSERVE C13, 100.6243801 MHz  
DECOUPLE H1, 400.1779555 MHz  
Power 38 dB  
continuously on  
WALTZ-16 modulated  
DATA PROCESSING  
Line broadening 0.5 Hz  
FT size 65536  
Total time 1 hr, 50 min

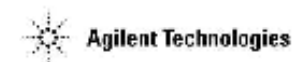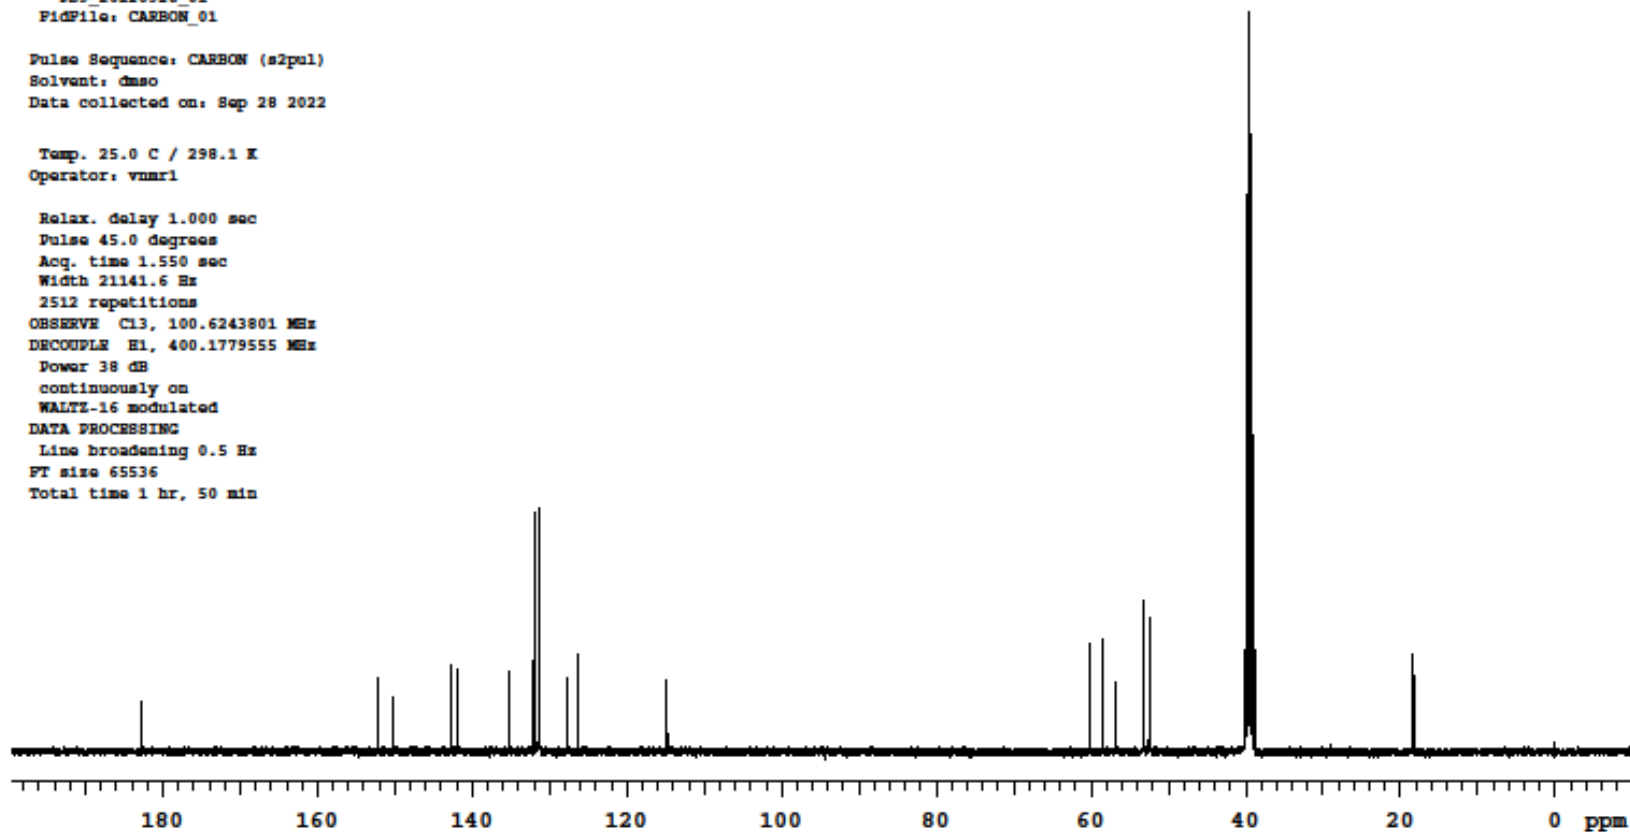



3-(4-((2-(4-Bromobenzoyl)-7-methylfuro[2,3-c]pyridin-4-yl)methyl)piperazin-1-yl)propanenitrile (PD10).

PD10

Sample Name:  
PD10  
Data Collected on:  
mercury400-mercury400  
Archive directory:  
/home/vnmr1/vnmrsys/data  
Sample directory:  
PD10\_20220925\_01  
FidFile: CARBON\_01

Pulse Sequence: CARBON (s2pul)  
Solvent: dmsc  
Data collected on: Sep 25 2022

Temp. 25.0 C / 298.1 K  
Operator: vnmr1

Relax. delay 1.000 sec  
Pulse 45.0 degrees  
Acq. time 1.550 sec  
Width 21141.6 Hz  
2000 repetitions  
OBSERVE C13, 100.6243834 MHz  
DECOUPLE H1, 400.1779555 MHz  
Power 38 dB  
continuously on  
WALTZ-16 modulated  
DATA PROCESSING  
Line broadening 0.5 Hz  
FT size 65536  
Total time 1 hr, 28 min

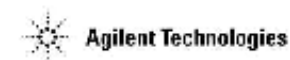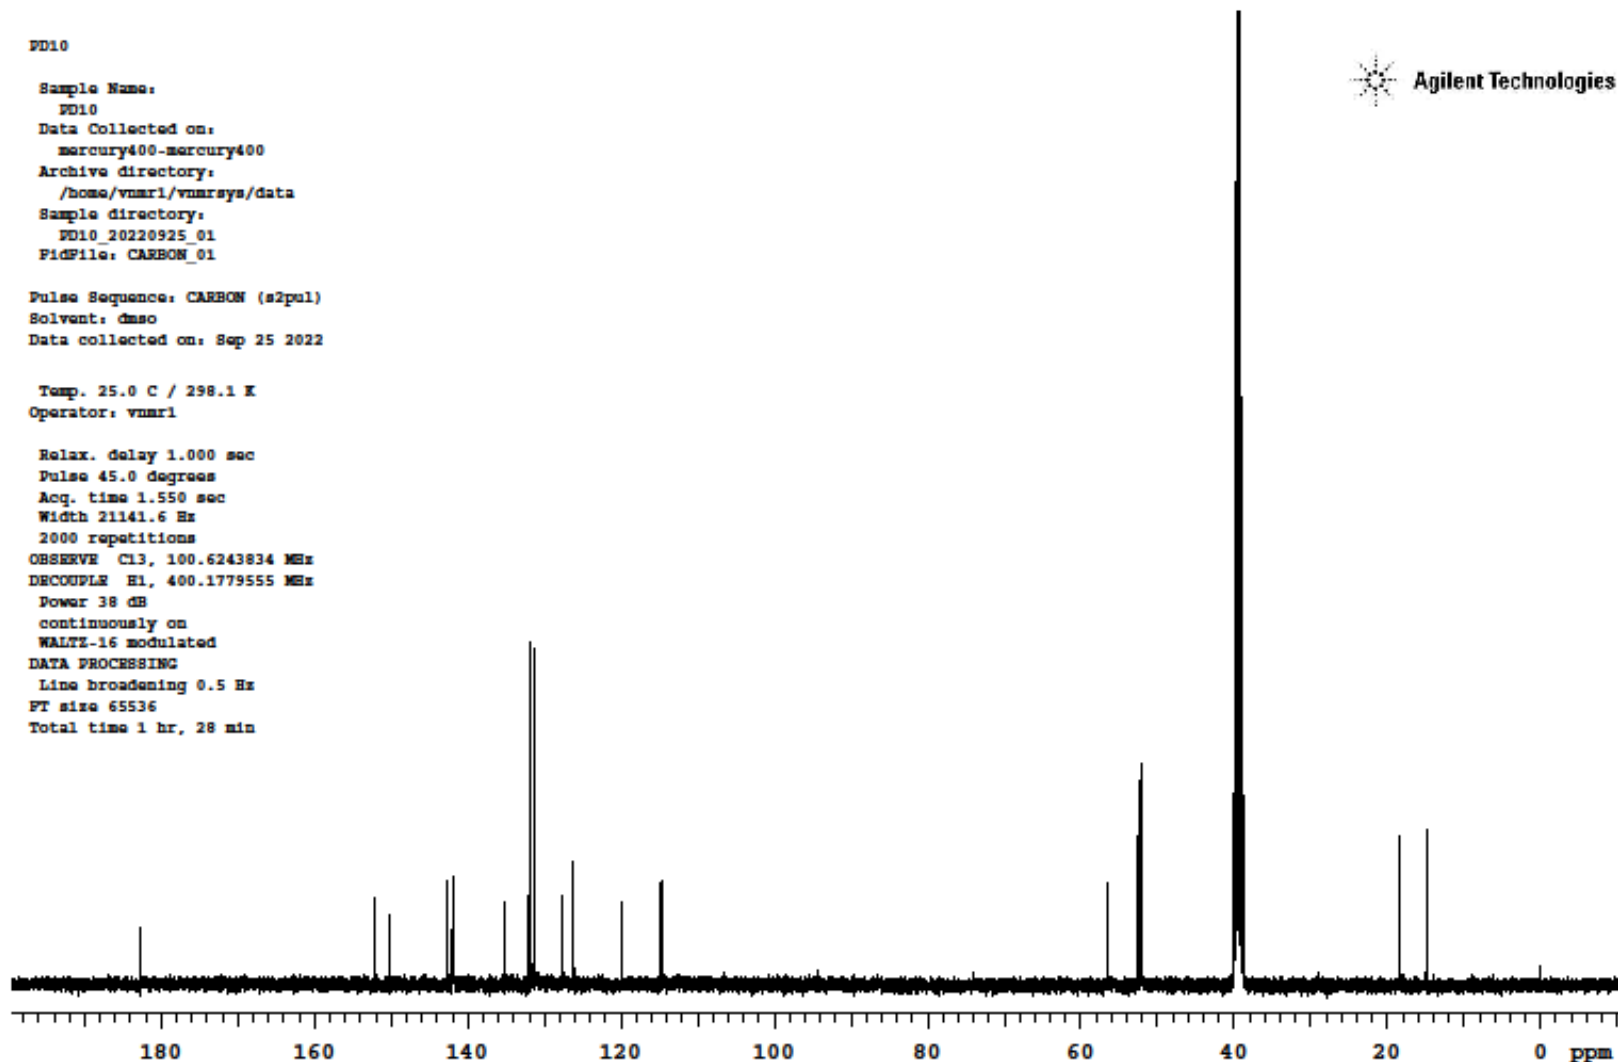

(4-Bromophenyl)(7-methyl-4-(((pyridin-3-ylmethyl)amino)methyl)furo[2,3-c]pyridin-2-yl)methanone dihydrochloride (**PD11**).

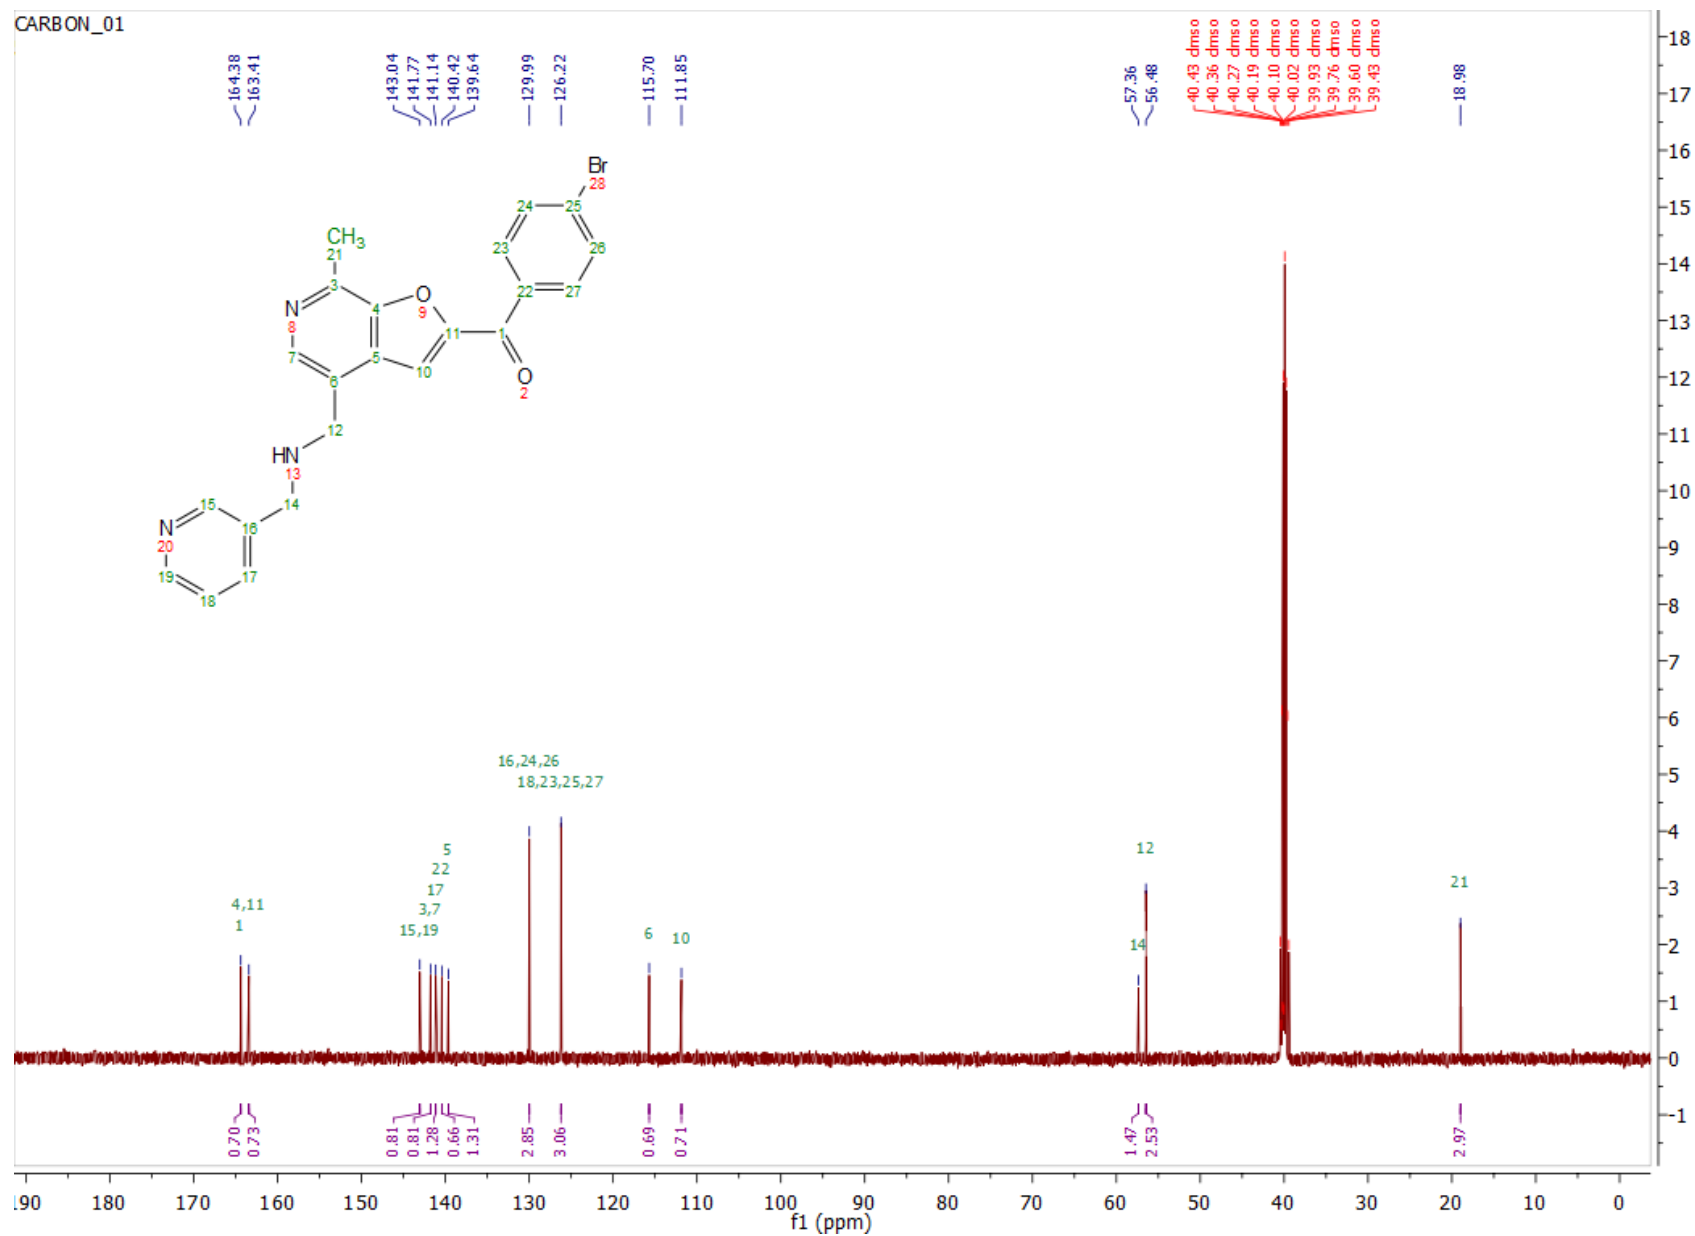

(1,4-Dihydrobenzo[d][1,2]dioxin-6-yl)(4-(((3,4-dimethoxybenzyl)amino)methyl)-7-methylfuro[2,3-c]pyridin-2-yl)methanone hydrochloride (**PD12**).

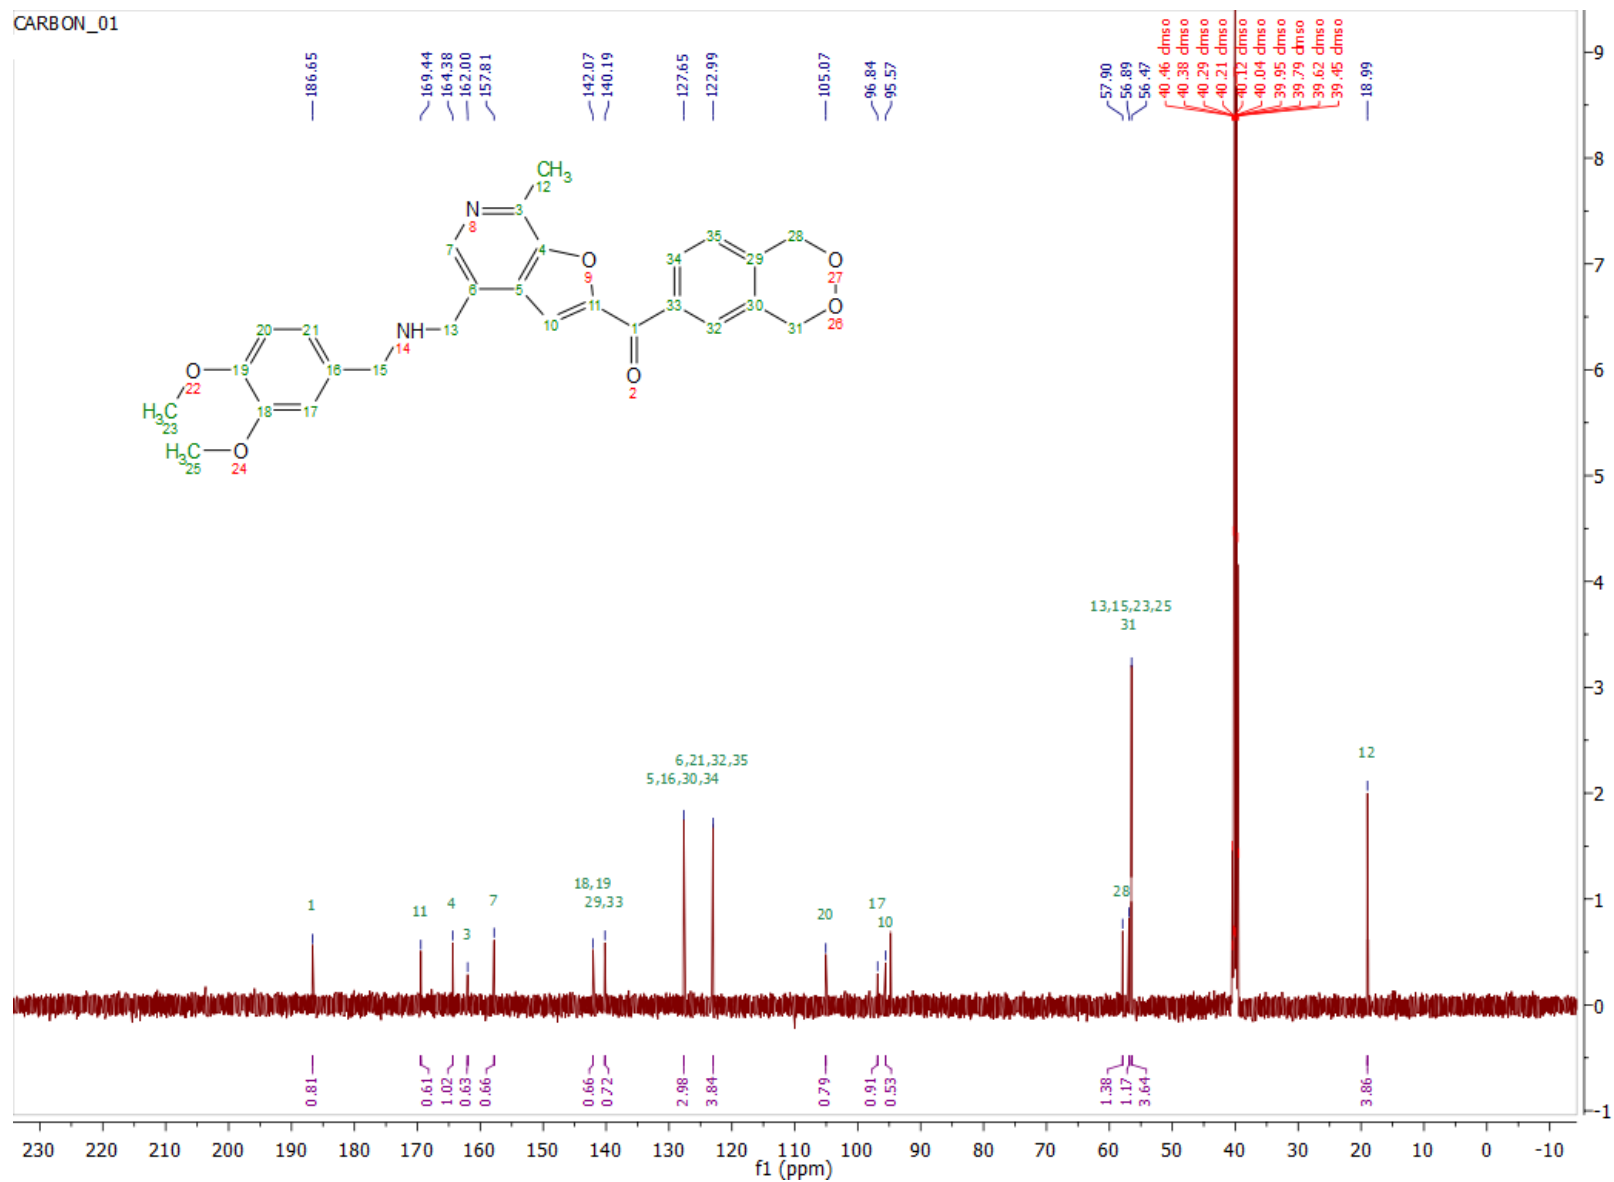

1,4-Dihydrobenzo[d][1,2]dioxin-6-yl)(7-methyl-4-((4-(pyridin-3-ylmethyl)piperazin-1-yl)methyl)furo[2,3-c]pyridin-2-yl)methanone dihydrochloride (PD13).

PD-13

Sample Name:  
PD-13  
Data Collected on:  
mercury400-mercury400  
Archive directory:  
/home/vnmr1/vnmrsys/data  
Sample directory:  
PD-13\_20220926\_01  
FidFile: CARBON\_01

Pulse Sequence: CARBON (s2pul)  
Solvent: dmsc  
Data collected on: Sep 26 2022

Temp. 25.0 C / 298.1 K  
Operator: vnmr1

Relax. delay 1.000 sec  
Pulse 45.0 degrees  
Acq. time 1.550 sec  
Width 21141.6 Hz  
2512 repetitions  
OBSERVE C13, 100.6243849 MHz  
DECOUPLE H1, 400.1779555 MHz  
Power 38 dB  
continuously on  
WALTZ-16 modulated  
DATA PROCESSING  
Line broadening 0.5 Hz  
FT size 65536  
Total time 1 hr, 50 min

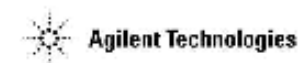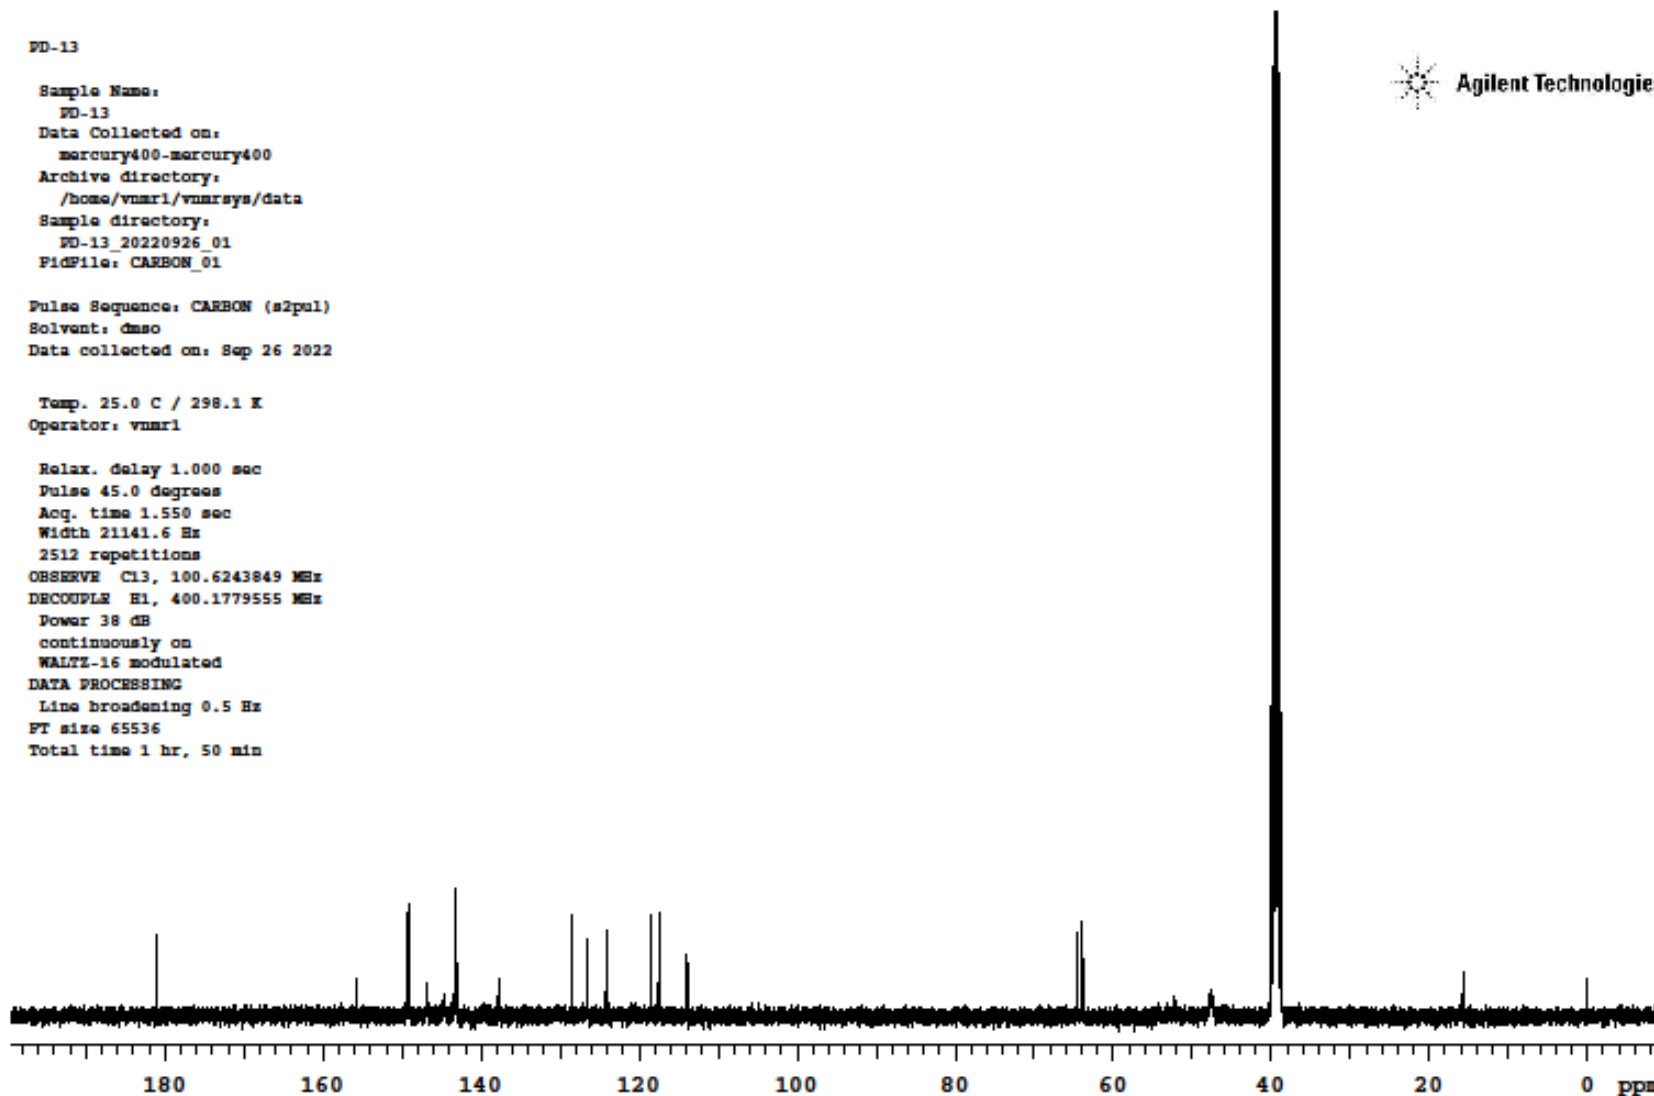

(1,4-Dihydrobenzo[d][1,2]dioxin-6-yl)(4-((2-hydroxyethyl)piperazin-1-yl)methyl)-7-methylfuro[2,3-c]pyridin-2-yl)methanone dihydrochloride (PD14).

PD14

Sample Name:  
PD14  
Data Collected on:  
mercury400-mercury400  
Archive directory:  
/home/vnmr1/vnmrsys/data  
Sample directory:  
PD14\_20221001\_01  
FidFile: CARBON\_01

Pulse Sequence: CARBON (s2pul)  
Solvent: dmsc  
Data collected on: Oct 1 2022

Temp. 25.0 C / 298.1 K  
Operator: vnmr1

Relax. delay 1.000 sec  
Pulse 45.0 degrees  
Acq. time 1.550 sec  
Width 21141.6 Hz  
4000 repetitions  
OBSERVE C13, 100.6243849 MHz  
DECOUPLE H1, 400.1779555 MHz  
Power 38 dB  
continuously on  
WALTZ-16 modulated  
DATA PROCESSING  
Line broadening 0.5 Hz  
FT size 65536  
Total time 2 hr, 56 min

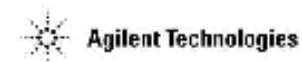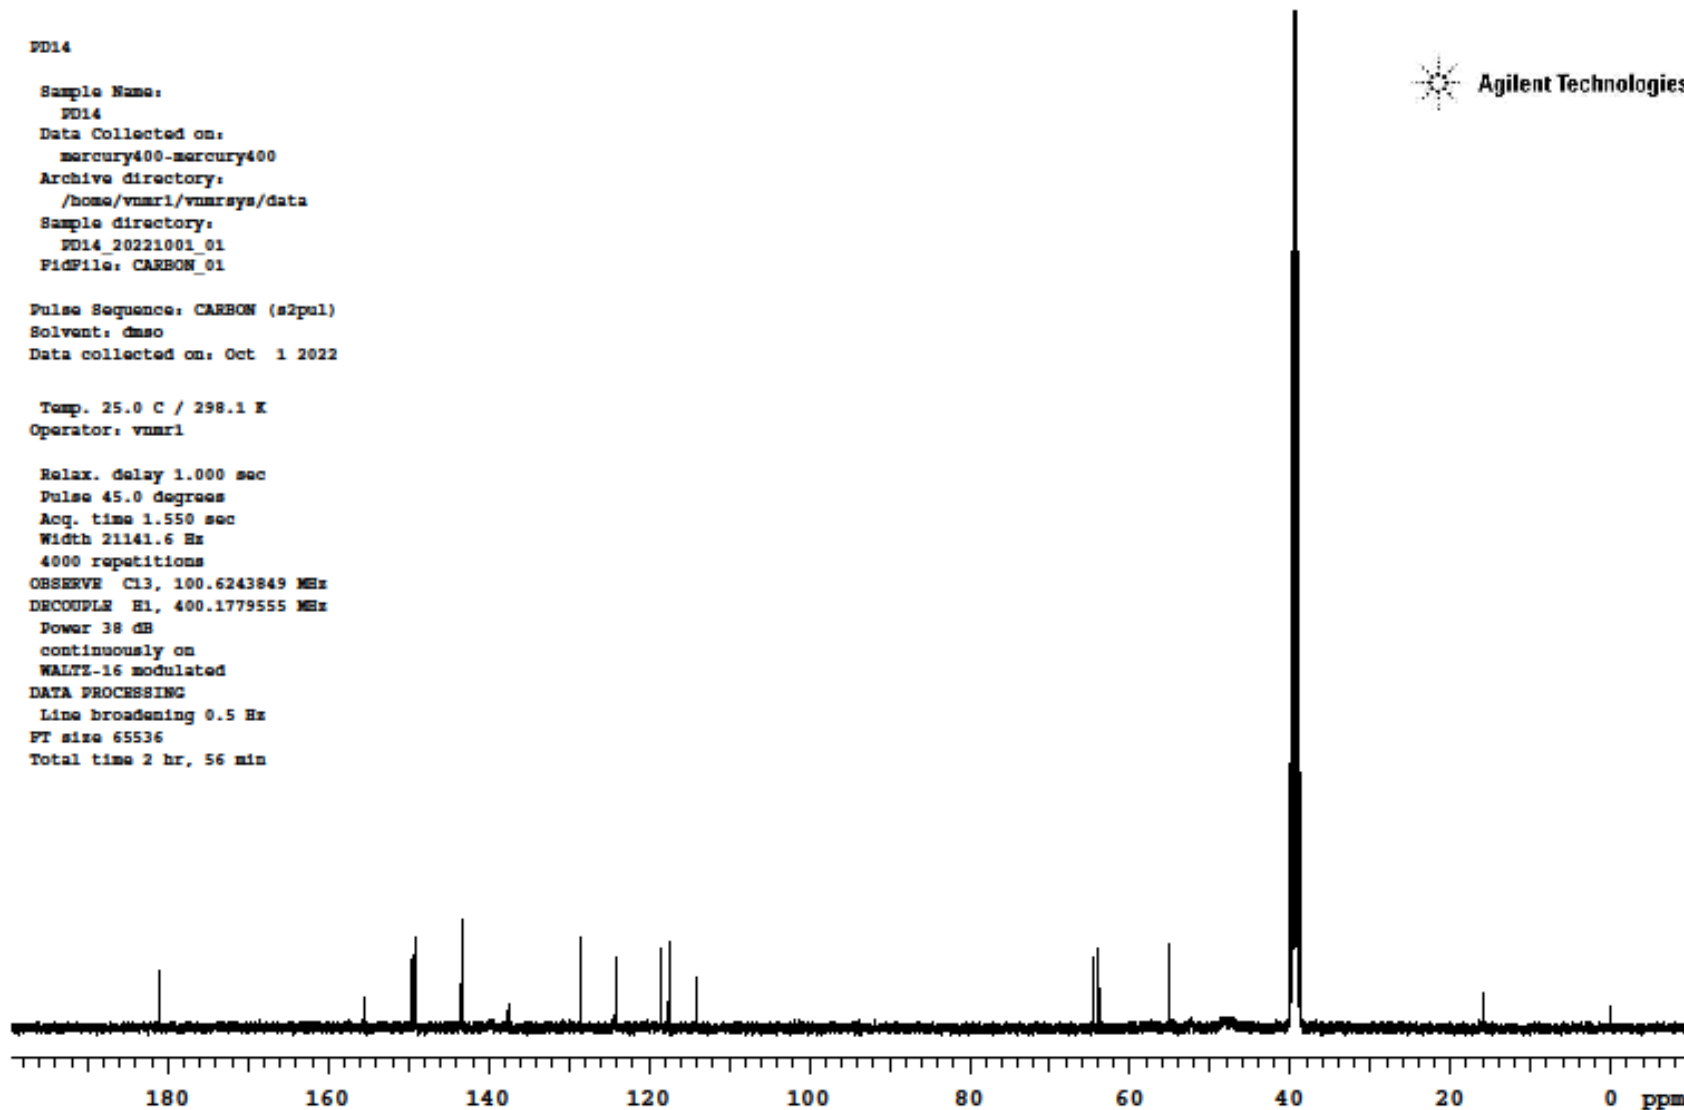

Supplement: s1 [file s1]
